# Supplementary material for: Global Analysis of mRNA Half-Lives and de novo Transcription in a Dinoflagellate, Karenia brevis
Source: PLoS One. 2013 Jun 11;8(6):e66347. doi: 10.1371/journal.pone.0066347 (PMC3679056; doi:10.1371/journal.pone.0066347)
Supplement: Table S2 — Half-lives for 7086 features passing quality filters based on newly synthesized RNA to pre-existing RNA ratios. (XLSX) [file pone.0066347.s004.xlsx]

## Sheet: Supplemental Table 2
Table S2. Half-lives for 7086 features passing quality filters based on newly sythesized RNA to pre-existing RNA ratios.
Contig	Sequence Description	BLASTx E-value	Half-life (m)
6070	hypothetical protein Strop_1435	0.041	41.8768
11633	unnamed protein product	0.001	44.5719
11641	elongation factor 1B gamma 1	3e-08	46.6268
3552	plastid periplasmic serine protease IV prote...	1e-148	46.9199
2543	proteophosphoglycan 5	0.041	47.4586
8528	M.TspMI	7	47.6058
7051	mCG13498, isoform CRA_a	3.7	48.0821
9417	PREDICTED: similar to hCG2043352	3.8	48.7592
1982	COG0383: Alpha-mannosidase	5e-08	50.4699
11141	hypothetical protein OsJ_016625	0.2	50.518
6840	predicted protein	0.99	51.7324
397	YD repeat protein	3e-13	52.1291
9837	putative surface protein	6e-19	52.7908
3927	*No hits found*	0	53.9764
9508	hypothetical protein LOC519447	0.12	55.6004
8037	ATP synthase F0 subunit 6	0.78	55.6297
2458	a-agglutininanchorage subunit	0.55	56.3293
294	major basic nuclear protein	1e-15	56.3846
7540	hypothetical protein	0.82	56.4563
6387	hypothetical protein AaeL_AAEL010707	0.57	56.7725
11723	transport protein Sec24, putative	2e-11	57.0838
11643	EPH receptor tyrosine kinase	0.76	58.138
5778	predicted protein	0.98	59.0203
11853	kinesin light chain-like protein	1e-28	60.2048
1967	calcium-translocating P-type ATPase, PMC...	3.4	60.6313
7625	hypothetical protein RB5263	4e-29	61.5607
5346	Hypothetical protein CBG16431	0.067	62.5303
6687	somatic regenerator RegA	0.2	63.0808
11665	*No hits found*	0	63.2833
8232	zinc finger, CCHC domain containing 6, isofo...	0.006	66.2422
3414	Tetratricopeptide TPR_2 repeat protein	2e-08	67.4711
10918	predicted protein	1e-10	68.5414
9201	deacetylase family protein	0.7	69.3644
10563	*No hits found*	0	70.0759
2243	chloroplast light harvesting protein isoform...	6e-16	70.9615
10669	PREDICTED: hypothetical protein	2.9	71.2694
11577	*No hits found*	0	71.2885
4975	hypothetical protein ASA_0374	1.2	72.1645
11273	potassium channel beta subunit	3e-27	74.188
10427	PREDICTED: similar to adenosine deamina...	5e-11	74.7274
6047	PREDICTED: similar to putative ion channel...	3e-14	74.766
6600	hypothetical protein An15g05270	0.71	75.1267
9608	hypothetical protein GSPATT00021611001 ...	7.1	75.4892
5460	distal-less homeobox 1	3.3	75.536
1311	hypothetical protein GSPATT00016118001 ...	0.005	76.0928
11691	hypothetical protein MXAN_0002	0.16	76.1812
6526	hypothetical protein PPSIR1_23249	0.003	76.7014
5845	predicted protein	0.43	76.924
7285	*No hits found*	0	77.5178
4654	ATP-binding cassette, sub-family F	1e-26	77.6535
11900	gastric mucin	0.11	78.3308
4826	Kynurenine 3-monooxygenase and related flav...	7e-08	78.4994
909	golgi autoantigen, golgin subfamily a, 2, is...	4.2	78.5106
9690	hypothetical protein BACCAC_02088	0.53	78.894
912	PREDICTED: similar to ankyrin 2,3/unc44...	7e-12	78.9763
6478	hCG2036879	0.25	79.5592
8751	oxidoreductase, aldo/keto reductase fami...	0.2	80.1396
9136	PREDICTED: similar to LOC553316 protein, p...	1.4	80.4203
7426	Unc45a	4e-09	84.0787
7316	Na/Ca eXchangers family member (ncx-7)	1e-17	84.1118
5229	hypothetical protein Tb10.6k15.3460	4e-78	84.5763
10137	Glycosyl transferase, group 1	0.11	85.1438
4504	unnamed protein product	0.32	85.2903
6948	Tubulin-tyrosine ligase family protein ...	4e-42	86.4779
5218	Putative O-Glycosyl hydrolase family 30 pro...	7e-10	86.8046
3964	proteophosphoglycan 5	0.11	86.9398
9274	Os08g0560000	0.0005	88.7181
7147	hypothetical protein LMIG_00829	0.16	89.736
1540	hypothetical protein Tc00.1047053510877.16...	8.4	90.2683
9386	ATP-binding cassette protein subfamily B mem...	3e-11	90.5894
6158	PREDICTED: similar to ap-PA	0.005	91.2775
8139	putative non-ribosomal peptide syntheta...	0.0007	91.7066
11154	expressed protein	0.12	91.7709
9222	CDP-Ethanolamine:DAG ethanolamine phosp...	4e-26	93.6012
6735	Integral membrane protein, putative	5e-15	94.4511
1939	flavodoxin protein precursor	1e-124	94.5975
1385	PREDICTED: plexin A3	1.2	94.773
10295	hypothetical protein, conserved	0.008	96.1596
5887	PREDICTED: similar to CG8176-PB, isoform B...	2.3	96.851
10821	UDP-N-acetyl-D-galactosamine:polypeptide N-a...	3e-05	96.9801
6007	predicted mitochondrial protein	2e-11	97.0134
10831	unnamed protein product	3.8	97.4
7352	urease, alpha subunit	0.23	98.0073
246	chloroplast light harvesting protein isoform...	1e-136	98.2658
7216	LPXTG cell wall surface protein	0.4	98.8204
4581	hypothetical protein L58460	0.009	98.9699
5756	kinesin heavy chain subunit	2e-20	99.3801
4626	alpha/beta hydrolase fold	8.8	99.589
5329	notchless	6e-54	100.049
9345	conserved hypothetical protein	7e-14	100.304
7658	ARF GTPase activating protein, putative...	3e-12	101.254
10050	mechanosensitive ion channel family protei...	5e-20	103.945
3219	CBS domain-containing protein-related	3e-19	105.193
5092	Kynurenine 3-monooxygenase and related flav...	6e-47	105.636
6863	predicted protein	0.32	105.704
5698	unknown protein	0.004	106.738
10342	AGAP002389-PA	0.068	106.869
7027	HCCA2 protein, isoform CRA_c	0.24	107.76
4684	putative alpha 1,3-xylosyltransferase	0.021	108.46
2720	nuclear receptor corepressor	3.8	108.829
6549	polyketide synthase type I	0.75	109.275
4072	unnamed protein product	0.026	110.004
4025	Ankyrin	1e-10	110.477
10741	CPA1 family transporter: sodium ion/pro...	0.78	110.914
8775	predicted protein	1.4	112.057
7827	hypothetical protein CHLREDRAFT_114572 ...	0.017	112.38
1505	keratin associated protein	5.5	112.887
11927	hypothetical protein	1.5	113.106
3725	BMY5 (beta-amylase 5); beta-amylase	1e-32	114.48
11186	predicted protein	0.0001	115.171
7313	predicted nucleoside-diphosphate sugar ...	5	115.369
10695	hCG1795174	0.36	117.706
8445	unnamed protein product	0.025	117.712
9328	flavin binding monooxygenase	0.17	117.975
9826	Hypothetical protein CBG10421	5.8	118.167
4765	integral membrane protein, putative / suga...	4e-18	118.253
1331	universal minicircle sequence binding p...	1e-13	119.038
2085	predicted protein of CLR family	0.001	119.212
5939	predicted protein	0.0001	121.312
10061	fumarate hydratase class I (ISS)	1e-118	121.753
2566	conserved hypothetical protein	0.42	123.53
7189	hypothetical protein BMAJHU_E0047	0.048	123.941
2187	PREDICTED: similar to Usp40 protein	4.1	124.398
11896	hypothetical protein	0.0003	124.678
5093	Kynurenine 3-monooxygenase and related flav...	7e-22	124.849
7813	FHA domain protein	2e-05	125.299
4251	COG0625: Glutathione S-transferase	2e-07	127.616
9244	*No hits found*	0	127.975
4743	NF-180	0.001	128.473
1973	heat shock protein SSA2	0.46	128.513
7280	hypothetical protein FRAAL5894	0.45	129.17
163	cytochrome b	1e-121	131.928
8095	hypothetical protein VspiD_30155	3e-05	133.204
4994	mitogen-activated protein kinase 1, serine/...	3e-42	134.066
11437	predicted protein	0.048	134.519
5656	ankyrin repeat domain 3	0.002	135.201
9904	methyltransferase-like protein	2e-24	135.675
8034	Indigoidine synthase A family protein	3e-70	137.339
11555	putative aldehyde dehydrogenase	2	138.098
7103	rCG28869	0.34	138.245
807	Xylose isomerase domain protein TIM bar...	0.92	141.395
8773	cysteine repeat modular protein 1 ...	0.001	141.598
11815	ATP synthase CF0A subunit	2e-10	142.138
6350	hypothetical protein RUMOBE_02783	2e-05	146.218
8227	predicted protease	2e-10	146.464
3993	transcription factor jumonji, jmjC	1	146.993
6551	FAD dependent oxidoreductase	8e-08	147.033
8689	dead/deah box helicase, putative	9e-13	147.131
10838	30S ribosomal protein S14	5e-20	147.382
10433	Probable protein arginine N-methyltra...	3e-15	148.755
11480	hypothetical protein DDBDRAFT_0218867	5.2	149.009
6834	Alpha-2-macroglobulin-like protein	0.11	149.075
5170	Anthranilate synthase component I and c...	0.74	149.783
3128	a2(IV) collagen, putative	0.003	150.207
11409	transmembrane protein 16H, isoform CRA_b	1e-05	151.437
11773	protein of unknown function UPF0187	0.018	152.235
10160	D-amino-acid dehydrogenase	1e-07	152.3
1636	predicted protein	0.001	152.984
8699	PREDICTED: similar to C6orf205 protein ...	0.0003	153.203
2353	photosystem II protein I	0.82	153.284
1163	hypothetical protein Tc00.1047053504019.3 ...	5e-06	154.423
5059	outer membrane protein OmpA	2e-09	154.859
1621	PREDICTED: hypothetical protein	2	155.406
4514	peptidyl-prolyl cis-trans isomerase cyclop...	7e-39	155.77
10812	Endonuclease/Exonuclease/phosphatase	1.7	156.184
7527	*No hits found*	0	157.114
5482	Short-chain dehydrogenase/reductase SDR ...	3e-32	157.74
4383	Protein kinase domain containing protei...	8e-13	158.989
177	*No hits found*	0	160.075
9848	W03G1.5	0.016	161.433
4004	Kynurenine 3-monooxygenase and related flav...	6e-42	161.939
1475	30S ribosomal protein S17	3.9	162.008
3011	hypothetical protein TVAG_300010	3.8	162.213
1612	hypothetical protein OsJ_004051	1.3	162.336
10104	FAD linked oxidase-like protein	0.22	162.652
1327	PREDICTED: hypothetical protein	0.018	162.97
6994	rCG63148	0.4	164.075
8895	chromatin modifying protein 1A isoform ...	1.8	164.091
4648	Fibronectin type III domain protein	1.5	165.881
1685	S-adenosylmethionine synthetase	1e-20	166.079
4357	*No hits found*	0	166.73
3282	protein with PPR repeats	2e-26	167.16
7378	unknown protein	1.4	168.322
6758	Ankyrin	2e-12	170.247
4817	peroxisome proliferator-activated recep...	0.14	170.906
5685	putative Na+/H+ exchange protein	2e-32	172.983
6296	Protein phosphatase 2C containing prote...	3e-09	173.121
7232	GTPase activator, putative	8e-14	173.247
1840	neurofilament triplet H1-like protein	0.002	173.693
443	*No hits found*	0	175.164
6696	regulatory protein, putative	4.8	176.917
1630	*No hits found*	0	178.921
10073	Zinc carboxypeptidase family protein	7e-21	180.281
2337	formin homology 2 domain containing 3	1.1	180.757
9661	DNAJ domain protein	5e-60	181.176
6318	*No hits found*	0	182.678
10141	immobilization antigen LA, putative	1.5	183.891
700	predicted protein	4.6	185.398
775	30S ribosomal protein S12	2e-39	185.892
4949	conserved hypothetical protein	0.22	186.22
3494	unnamed protein product	0.45	187.27
11026	predicted protein	5e-21	187.416
6072	glycogen branching enzyme	0.71	188.745
6520	PREDICTED: similar to human immunodeficien...	2.5	189.636
5146	predicted protein	0.008	190.655
10102	aarF domain containing kinase 1	2e-21	190.973
3520	heat shock protein (Hsp40), co-chaperone w...	8e-12	191.274
5024	putative acetyltransferase protein	3.2	191.275
3386	DnaJ (Hsp40) homolog, subfamily C, member 7,...	1e-13	191.416
1412	hypothetical protein	0.069	191.608
2314	trichohyalin, putative	0.063	194.353
7794	unnamed protein product	0.016	199.011
9310	putative cleavage and polyadenylation specif...	8e-63	199.769
10097	hypothetical protein GSPATT00011436001 ...	5e-12	200.126
5695	predicted protein	0.0003	201.225
6163	hypothetical protein P9211_15381	1e-17	201.395
5408	PREDICTED: mucin 17	0.33	202.503
1815	Hypothetical protein LEPBI_I1215	2e-18	202.571
621	putative outer membrane protein, probabl...	0.79	202.6
5005	hypothetical protein CIMG_07849	0.002	203.509
3669	unnamed protein product	0.3	203.588
4141	PREDICTED: hypothetical protein	1.8	205.666
8845	cytoplasmic DExD/H-box RNA helicase	7e-29	206.363
9135	dynein heavy chain 3	0.45	206.946
1590	PREDICTED: similar to pleckstrin homolo...	2.7	207.642
5474	ribosomal protein S4	0.25	208.403
1128	*No hits found*	0	209.999
5119	Kynurenine 3-monooxygenase and related flav...	6e-29	210.546
11715	ABC transporter related	1e-64	212.822
11934	unnamed protein product	0.042	212.823
9260	PREDICTED: hypothetical protein	0.007	212.942
947	hypothetical protein MELB17_10603	2.9	213.168
1796	ubiquitin-protein ligase E3 (predicted)	4.1	214.026
5036	hypothetical protein STIAU_8355	0.0005	214.741
11288	glycosyltransferase	4e-38	215.159
1533	Hypothetical protein GL50803_10260	1.7	215.912
4562	oligosaccharyl transferase subunit, putativ...	2e-51	216.637
5690	seryl-tRNA synthetase, putative / serine--t...	3e-55	217.464
8077	PREDICTED: similar to tripartite motif ...	3.1	217.76
4579	Golgi transport complex protein-related	6e-23	219.022
7653	calmodulin-domain protein kinase 1	5e-07	219.035
4104	Neurohypophysial hormones, N-terminal Doma...	1e-06	219.917
3782	PREDICTED: similar to CG13731-PA	1e-08	222.323
5875	*No hits found*	0	222.351
11848	Carboxylesterase	1e-13	223.619
7934	transferase hexapeptide repeat	3e-11	224.32
11088	retrotransposon protein, putative, unclassif...	0.0009	224.678
4140	involucrin repeat protein, putative	0.071	224.851
785	hypothetical protein OsJ_004051	1.3	225.464
6737	Methyltransferase type 11	7e-10	227.162
8814	Phosphatidylserine/phosphatidylglycerop...	0.11	229.349
10825	kinesin K39, putative	2e-06	231.062
9654	predicted protein	0.062	231.789
1547	hypothetical protein sce4039	0.19	232.278
7683	bifunctional sulfate adenylyltransferase s...	1.8	234.722
10110	predicted protein	0.0001	235.069
6357	hypothetical protein PICST_78645	0.69	235.353
5137	Kynurenine 3-monooxygenase and related flav...	8e-42	236.082
5987	Alcohol-acetaldehyde dehydrogenase	6	237.44
1851	*No hits found*	0	239.988
9859	GTP-binding protein, putative	3e-08	240.156
9239	putative non-ribosomal nucleolar protein	1e-06	240.296
7072	hypothetical protein Tc00.1047053511559.50...	1.9	241.271
9286	predicted protein	0.0004	243.381
4841	mycarose O-acyltransferase	0.043	244.178
1950	chromodomain helicase DNA binding prote...	2e-05	247.553
11548	DUF563 domain protein	0.2	248.133
9677	hypothetical protein NEMVEDRAFT_v1g1788...	0.027	250.197
626	bag of marbles	1.1	250.512
6540	putative peptide syntethase	4e-07	250.97
1651	Nuclear pore complex component (sc Seh1) (I...	2e-08	251.402
7799	unnamed protein product	0.67	252.833
11644	proteophosphoglycan ppg4	0.052	253.28
1011	hypothetical protein MT325_m768L	1.7	254.432
11683	sec-independent protein translocase-like p...	1e-13	254.462
7875	peptide ABC transporter, Pep4E family, ...	0.2	254.545
215	putative dioxygenase	3e-58	255.385
7284	hypothetical protein OsJ_017675	7e-09	255.412
10005	Nucleoside-diphosphate-sugar epimerases-...	0.15	255.85
236	PREDICTED: hypothetical protein, partial	0.21	257.277
8124	SPRY domain containing protein	8e-10	257.395
5615	heavy metal translocating P-type ATPase...	1.3	257.478
11338	hypothetical protein MAP1875c	0.014	258.679
8869	hypothetical protein PF14_0502	3e-15	261.567
2727	FAD dependent oxidoreductase	2.3	261.897
5107	hypothetical protein OsI_022824	0.24	262.659
9128	hypothetical protein BACOVA_02587	3.9	263.154
11797	*No hits found*	0	263.992
3411	acetyl esterase family enzyme	2e-08	265.128
140	PNGase CG7865-PA, isoform A	1e-05	267.762
1523	Oxidoreductase domain protein	5	267.898
5522	sp4 protein	3e-07	268.099
597	pentatricopeptide (PPR) repeat-containing ...	4e-11	268.127
4940	hypothetical protein LOC100142646	8e-07	268.867
5017	hypothetical protein TVAG_434750	0.96	273.662
5113	Kynurenine 3-monooxygenase and related flav...	3e-36	275.999
634	hypothetical protein SmalDRAFT_0532	0.78	276.413
6831	hypothetical protein CferDRAFT_0813	0.3	276.771
3759	CG15011 CG15011-PA	0.4	279.218
4150	PREDICTED: similar to Zinc finger CCCH-...	1e-07	281.026
3462	hypothetical protein PGUG_01202	0.035	281.437
4865	*No hits found*	0	281.829
8003	hypothetical protein	2.7	282.261
10415	hypothetical protein EF0689	8.6	282.463
11575	elongation factor G	1.1	283.829
6310	Carboxylesterase, type B	8e-28	285.413
2084	ornithine cyclodeaminase	0.26	285.716
5398	conserved hypothetical protein	0.16	286.814
5529	PREDICTED: forkhead box O1A	0.17	288.718
3072	Auh-prov protein	6.4	288.886
6770	Helicase c2	2.7	289.571
10154	kinesin K39, putative	1e-05	293.785
3764	PREDICTED: similar to myeloid translocatio...	1e-06	295.234
3861	dehydrogenase MVIM-sugar aminotransferase fu...	8e-07	295.43
1383	serine protease-like protein	1.3	296.002
2757	RNA polymerase, sigma 28 subunit, FliA/...	0.079	296.668
9601	conserved hypothetical protein	0.12	297.096
6649	hypothetical protein CaO19_11806	3.1	298.57
413	PTAC2 (PLASTID TRANSCRIPTIONALLY ACTIVE2);...	1e-09	298.599
3312	protein with PPR repeats	8e-19	298.89
10448	hypothetical protein Tfu_0383	1.6	300.433
11124	hypothetical protein, conserved	0.03	300.692
9701	PREDICTED: similar to KIAA0225 isoform 1	1	301.151
7986	S-adenosylmethionine decarboxylase proenzy...	0.0001	301.505
7590	amelogenin	0.005	302.423
6376	unnamed protein product	0.038	303.08
2609	hypothetical protein c1235	0.18	303.354
1378	*No hits found*	0	304.209
9797	ACBP5 (ACYL-COA BINDING PROTEIN 5, ACYL-CO...	5e-10	304.29
146	para-nitrobenzyl esterase (intracellular e...	5e-21	306.423
542	retinoid-x-receptor	4.1	307.28
9166	Os11g0241200	0.21	307.611
4723	predicted protein	0.005	308.169
4403	glycine-rich protein; atGRP	0.45	308.683
3922	polyketide synthase, putative	0.007	308.932
11494	EEA1 (Early Endosome Antigen, Rab effec...	6e-05	309.268
5638	EG382639 protein	0.75	310.777
9139	kinesin light chain-like protein	1e-08	310.941
6521	PREDICTED: similar to meichroacidin	2e-15	312.18
10766	SIR2-like histone deacetylase	1e-47	312.4
10787	Clp protease ATP binding subunit	8e-75	312.58
1310	Kynurenine 3-monooxygenase and related flav...	2e-26	314.015
945	oocyte maturation factor Mos	8.6	314.374
7155	unnamed protein product	0.006	317.476
6710	arginine/serine-rich splicing factor 4 ...	0.15	318.778
11451	unnamed protein product	0.057	321.079
10960	predicted protein	0.27	321.38
4737	Gag polyprotein >gi|51980734|gb|AAU20797.1| ...	1.5	323.554
9371	hypothetical protein Anae109_2880	0.16	323.595
9918	putative peptidase	0.42	324.705
10246	Protein kinase domain containing protei...	3e-41	325.374
11048	hypothetical protein TVAG_193960	0.036	326.933
6654	Phycocyanin alpha-subunit phycocyanobilin ...	2e-06	327.751
4942	mitochondrial transcription termination...	0.001	328.235
1470	*No hits found*	0	328.241
7113	predicted protein	4e-05	330.07
1003	metallo cofactor biosynthesis protein	8.4	330.768
1363	calmodulin	2e-05	331.71
11056	hypothetical protein P9211_15361	2e-10	333.024
3262	predicted protein	0.0002	336.987
7815	peptidase, M48 family	1.4	341.442
529	RNA pseudouridylate synthase	5e-10	341.779
2252	cold shock protein-like	5e-05	342.678
9057	unnamed protein product	0.002	343.651
2721	hypothetical protein CaO19_8547	0.36	344.626
9400	hypothetical protein OsI_005629	0.33	346.239
9061	predicted protein of CLR family	0.12	347.005
1901	hypothetical protein	0.018	347.27
5075	EF hand family protein	0.21	347.577
1309	hypothetical protein llmg_0924	1.7	347.732
11875	Kynurenine 3-monooxygenase and related flav...	9e-41	347.872
2259	unnamed protein product	0.2	348.241
401	hypothetical protein Arth_3476	1	349.119
1189	PREDICTED: similar to RAPH1 protein	0.027	349.212
3855	hypothetical protein, conserved	0.081	352.199
7714	AAA family ATPase Grc3 (predicted)	4e-11	352.981
5835	hypothetical protein CHLREDRAFT_105488 ...	0.0003	353.21
6314	hypothetical protein NCU06607	0.071	353.598
11680	Glycyl-tRNA synthetase beta subunit	3.9	353.944
5458	PREDICTED: similar to a disintegrin-like a...	1.4	354.807
7719	multifunctional fatty acid oxidation compl...	2.2	355.71
2796	hypothetical protein BBOV_III002980	9e-39	356.111
11912	polyprotein	1.2	357.895
8799	hypothetical protein CIMG_00840	0.005	359.134
3697	hypothetical protein Strop_0382	0.97	360.412
9428	PREDICTED: hypothetical protein	0.061	360.601
2279	fibronectin type III domain protein	3.9	364.25
9793	ATP-dependent DEAD/H RNA helicase, putativ...	3e-11	364.966
8302	unknown	0.78	365.024
11669	hydrolase	1e-05	367.867
6153	hypothetical protein Bpet3555	6.8	369.496
8833	mucin 13, epithelial transmembrane, isoform ...	0.0001	370.505
1211	unnamed protein product	2	370.752
1106	PREDICTED: similar to ankyrin 3	4e-08	371.474
212	cell division protein	1.8	371.661
1187	hypothetical protein GSPATT00005753001 ...	0.003	371.985
7087	chromosome segregation protein SMC	4e-13	373.251
4048	hypothetical protein PPSIR1_04313	0.35	374.144
386	hypothetical protein CC1G_09106	0.031	374.307
1943	flavodoxin protein precursor	1e-28	376.391
3261	pentatricopeptide (PPR) repeat-containing ...	3e-15	377.234
7114	PREDICTED: similar to pleckstrin homology ...	1.7	377.576
10200	hypothetical protein DEHA0D03916g	0.014	379.034
8664	restriction modification system DNA specif...	0.029	380.256
1893	hypothetical protein PC108701.00.0	1.3	380.602
9821	hexosaminidase B, isoform CRA_c	2e-49	381.122
2724	translation elongation factor FusA	2.9	382.007
8167	RNA helicase, putative	3e-16	382.627
8051	Kinesin motor domain containing protein...	2e-56	383.109
9058	hypothetical protein OsJ_026630	0.29	383.459
3050	putative transposase	1.2	384.012
11520	PREDICTED: similar to zinc finger prote...	1.6	384.084
11545	hypothetical protein GSPATT00031683001 ...	4e-21	385.122
6941	unknown	3e-05	385.939
5047	hypothetical protein PVX_098950	1.6	387.558
651	*No hits found*	0	387.929
5863	rod shape-determining protein MreD	7.9	388.39
6998	nocturnin CG31299-PD, isoform D	7e-12	390.126
3996	PREDICTED: similar to lipid phosphate phos...	0.046	390.385
2602	truncated posterior sex combs	0.089	393.497
7389	DNA topoisomerase III	3e-15	393.847
8477	CwfJ-like family protein / zinc finger (CC...	2e-05	395.666
4573	AGAP009128-PA	0.0003	397.734
316	hypothetical protein FG06754.1	2.3	399.944
2104	peptidase C39, bacteriocin processing	2.9	400.406
9714	phospholipase/Carboxylesterase	2e-08	400.622
9411	C33D9.8	0.042	402.276
5944	Kynurenine 3-monooxygenase and related flav...	0.031	404.312
2427	Nedd8 CG10679-PA	0.11	404.674
5752	predicted mitochondrial protein	2e-10	405.02
2583	PREDICTED: similar to mucin 5	2	407.287
1192	transcriptional regulator, LysR family	8.4	407.682
7729	prolyl aminopeptidase	0.61	408.576
2109	hypothetical protein EUBSIR_00615	8.4	408.8
3284	predicted protein	0.9	409.675
1432	predicted protein	0.024	409.857
9847	gamma-glutamyl hydrolase (conjugase, folyl...	2e-49	410.501
8070	cutinase negative acting protein	5e-14	411.149
481	peptidase C14, caspase catalytic subunit p20...	0.61	411.291
7256	hypothetical protein MBMO_EBAC080-L32B05.65 ...	0.33	411.667
3295	putative type III effector protein with ppr...	1e-05	412.228
7462	serine/threonine protein kinase	5e-48	413.811
11189	hypothetical protein Krad_0251	0.79	416.391
6842	putative asparagine synthetase	7e-06	416.789
7659	hypothetical protein Jann_0597	2.3	417.635
7573	PBS lyase HEAT-like repeat protein	0.041	418.156
3257	pentatricopeptide (PPR) repeat-containing ...	3e-24	418.441
5159	PREDICTED: similar to prefoldin subunit...	6e-20	419.776
6235	membrane associated protein, putative	3e-08	420.552
3254	putative type III effector protein with ppr...	2e-15	420.845
5144	ankyrin repeat protein, putative	1e-37	421.14
1667	hypothetical protein SI859A1_02466	2.8	422.837
3507	hypothetical protein BC1G_13548	0.005	424.1
1366	unnamed protein product	0.001	424.545
11527	low-molecular-weight glutenin subunit	0.22	424.667
3314	hypothetical protein NCU01351	0.18	424.77
5371	dynein heavy chain 4	1.4	425.534
4348	hypothetical protein BU535	3.3	425.826
4631	hypothetical protein TVAG_221970	3e-06	425.902
7923	hypothetical protein APE_0080.1	3.8	426.306
11211	Bowman-Birk serine protease inhibitor f...	2	428.138
10056	myosin heavy chain	2e-07	428.342
1196	hypothetical protein	2.3	429.536
3932	unnamed protein product	0.048	429.572
8785	B0511.12	0.18	429.859
8438	Epa5p	3e-07	430.076
1347	hypothetical protein Veis_0863	0.34	430.508
7371	3D domain protein	0.11	431.955
3981	peptidylprolyl isomerase D (cyclophilin...	3e-12	432.366
3438	HEAT domain protein repeat-containing p...	3e-17	433.969
2623	elongation factor EF-Tu	0.88	435.242
4010	Proline-, glutamic acid- and leucin...	2	436.391
5168	family with sequence similarity 51, member A...	0.35	436.557
7775	Os09g0315200	0.036	437.054
8600	prolyl 4-hydroxylase alpha-related prot...	6e-19	437.055
2660	homologue of rhodobacter capsulatus gene...	1.1	437.27
8953	homoserine dehydrogenase	8e-31	437.793
11692	PREDICTED: similar to SFRS4	0.015	437.799
8901	predicted protein	0.001	439.792
11825	hypothetical protein Strop_1435	0.003	440.919
9272	glycoside hydrolase family 2 sugar bind...	3e-20	441.443
1906	spindle-pole body protein (Pcp1), putat...	0.031	447.469
4844	PREDICTED: similar to cisplatin resista...	2e-14	447.5
9858	hypothetical protein Bpro_4874	3e-15	448.873
2401	putative polyprotein	5.1	449.835
3278	putative type III effector protein with ppr...	1e-28	449.98
9872	cellobiohydrolase II	1e-09	450.976
6534	predicted protein	3e-19	451.052
7191	hypothetical protein, conserved	0.024	451.532
10248	dual specificity protein phosphatase famil...	1e-10	451.9
10239	Methyltransferase FkbM	1e-05	452.182
7115	PREDICTED: hypothetical protein	6.6	452.837
8994	predicted protein	0.37	452.862
8602	AGAP002226-PA	0.2	452.883
10359	*No hits found*	0	453.127
11071	General substrate transporter	7e-39	453.341
2823	transition protein 2 (during histone to pr...	0.53	453.374
8487	PREDICTED: similar to RIKEN cDNA 503141...	0.11	453.629
1966	hypothetical protein nfa8110	4	453.713
8200	PREDICTED: hypothetical protein XP_846177 ...	1.4	455.269
11302	PREDICTED: hypothetical protein	0.002	455.63
4111	High cysteine membrane protein EGF-like...	0.92	456.172
944	*No hits found*	0	456.336
3138	extracellular protein with a signal peptid...	0.029	456.409
9151	PREDICTED: similar to NOD3 protein	5e-34	456.716
2708	hypothetical protein Tc00.1047053506529.70...	2	456.788
6623	PREDICTED: similar to CG13731-PA	5e-14	456.883
5862	PREDICTED: similar to CG13731-PA	0.0002	457.244
7279	cryptochrome 1a	1.4	457.997
7246	phosphoglycerate/bisphosphoglycerate mutas...	3e-31	458.038
8125	COG5295: Autotransporter adhesin	1.5	458.459
7689	GDSL-motif lipase/hydrolase family protein...	3e-17	458.794
8039	putative NTP pyrophosphatase	7e-35	459.316
2890	regulator of chromosome condensation, R...	0.5	460.523
9746	PREDICTED: similar to conserved hypothe...	0.07	462.474
11204	aminoacid ABC transporter, inner membrane...	0.26	463.079
6692	PREDICTED: similar to TNF receptor-asso...	2e-09	463.26
10944	PREDICTED: similar to olfactomedin 1	0.12	464.36
5271	PREDICTED: tubulin tyrosine ligase-like fa...	0.005	464.41
3928	hypothetical protein OsJ_027972	4	464.773
4112	hypothetical protein, conserved	0.006	464.894
7293	*No hits found*	0	465.318
5099	hyothetical protein	0.054	465.708
7607	protein disulfide isomerase (PDI)-like prote...	2e-06	466.675
8325	FHA domain containing protein	0.023	468.329
7348	PREDICTED: similar to solute carrier famil...	6e-15	468.753
5972	unnamed protein product	0.04	469.589
3851	hypothetical protein FG10054.1	0.06	469.592
622	Sir2 family protein	1e-08	470.691
8647	predicted protein	5e-06	471.045
9979	translation initiation factor IF-2	0.0002	473.175
11721	hypothetical protein EUBSIR_02045	1.2	473.201
172	monomeric NADP(+)-dependent isocitrate dehyd...	3e-74	473.701
3271	pentatricopeptide (PPR) repeat-containing ...	5e-11	473.972
4985	ribeye	2.1	475.039
4943	mitochondrial transcription termination fa...	0.022	476.666
3266	pentatricopeptide (ISS)	4e-06	478.081
970	ABC-2 type transporter	5	478.228
7594	Parallel beta-helix repeat protein	0.32	479.74
4498	PREDICTED: similar to KIAA0595 protein ...	0.039	479.827
3279	pentatricopeptide (PPR) repeat-containing ..	2e-29	480.084
5444	ankyrin repeat protein E4_2	4e-14	480.491
8866	PREDICTED: hypothetical protein	2	481.484
8983	hypothetical protein DDBDRAFT_0218318	0.001	482.244
8427	dissimilatory sulfite reductase alpha subuni...	0.83	482.772
527	Heavy metal efflux pump	5.9	482.947
3288	putative type III effector protein with ppr...	0.05	484.039
10171	hypothetical protein GSPATT00018898001 ...	8.6	484.518
9888	hypothetical protein LOC495696	0.0001	484.612
9900	hypothetical protein PPSIR1_18712	2e-09	484.958
3291	pentatricopeptide (PPR) repeat-containing ...	3e-33	485.567
9233	phenylalanyl-tRNA synthetase, beta subun...	5e-11	485.69
6231	hypothetical protein PPSIR1_20049	1	485.942
1374	PREDICTED: similar to SH3 and multiple ank...	1.3	486.94
285	Carboxylesterase	6e-14	487.1
11845	SAM (and some other nucleotide) binding...	5e-37	487.821
11903	*No hits found*	0	490.345
3267	putative type III effector protein with ppr...	9e-09	490.421
3580	predicted protein	8e-09	490.508
3975	antigenic protein, putative	0.014	490.922
11778	ribonuclease, Rne/Rng family	0.014	493.392
5166	poly-A polymerase small subunit	0.004	493.559
4219	PREDICTED: similar to FEX2	0.42	493.867
2078	*No hits found*	0	495.164
2123	*No hits found*	0	496.663
3511	acetylornithine deacetylase	0.98	497.4
3506	ribose ABC transporter, ATP-binding protein ...	1.5	500.646
5911	DnaJ-like protein	2e-25	502.531
960	Protein kinase	0.45	503.135
3258	pentatricopeptide (PPR) repeat-containing ...	2e-36	503.588
6805	ATP-binding cassette transporter, subfa...	7e-07	504.533
452	hypothetical protein DDBDRAFT_0217843	0.002	504.665
8107	DNA repair helicase, putative	8.7	506.083
7497	DAXX	2	506.377
5086	putative integral membrane protein	5	507.698
1068	S-adenosylmethionine synthetase	4e-12	508.426
3106	Penicillin amidase family protein	0.051	509.249
7880	Protein kinase domain containing protei...	1e-09	509.57
3648	putative transport protein (ABC superfamil...	6e-07	509.736
1217	putative RecB family exonuclease	3.8	510.232
11505	hypothetical protein TVAG_151660	0.77	510.974
5603	hypothetical protein DDB_0233766	0.06	511.103
1616	*No hits found*	0	512.605
5585	iron-sulfur cluster-binding protein	6.8	514.178
8088	hypothetical protein DDBDRAFT_0189564	0.014	514.847
3292	pentatricopeptide (PPR) repeat-containing ...	3e-28	515.127
2042	O-methyltransferase, family 3	1e-47	515.991
4239	T-lymphocyte CD2 receptor-like pro...	0.57	516.085
7899	hypothetical protein PVX_091435	0	517.176
8598	CYC2-like cyclin, putative	0.24	517.258
5336	protein disulfide-isomerase	1e-20	517.392
2628	predicted protein	2.5	518.273
7019	predicted protein	1.2	519
2178	PREDICTED: similar to mucin 5	0.034	520.048
1029	mCG145321, isoform CRA_b	3.8	520.612
7286	psaB translation factor	0.64	520.612
9718	pentatricopeptide (PPR) repeat-containing ...	2e-10	522.126
8216	PREDICTED: similar to Chromosome 5 open...	1.8	523.632
10341	cytochrome P450	0.5	523.897
9120	lipoprotein, putative	5e-47	524.565
4530	unnamed protein product	1.3	524.765
6591	Chain A, Crystal Structure Of Arabinofuranosidas...	6e-46	525.589
1574	U-box domain containing protein	2e-48	525.598
4694	actin binding protein, putative	1e-11	527.349
9619	hypothetical protein NCU02184	0.005	527.802
378	PREDICTED: similar to metaxin 1,	0.33	528.116
9013	integrase/recombinase	0.61	528.189
10972	unknown protein	8e-05	529.493
10987	structural capsid protein	0.46	529.672
11294	unnamed protein product	0.84	531.615
11799	hypothetical protein ANACOL_03501	2.6	531.693
6284	molecular chaperone DnaK	3e-49	531.954
3894	predicted protein	1.9	532.021
7848	calcium-transporting ATPase 1, endoplasmic...	8e-44	533.439
11837	hypothetical protein P9211_15361	9e-15	534.302
2390	PREDICTED: similar to EF-hand domain famil...	3.2	534.332
7680	Fe-S-cluster redox enzyme, radical SAM fam...	0.21	535.257
3123	squamosa promoter binding protein	0.0004	535.4
3287	pentatricopeptide (PPR) repeat-containing ...	9e-21	535.86
4212	glucosidase	0.2	536.908
1242	PREDICTED: hypothetical protein LOC3820...	0.19	537.427
9138	putative bacteriophage regulatory prote...	1.7	537.97
11832	putative lipopolysaccharide biosynthesis...	0.086	540.053
3018	PREDICTED: similar to GA19454-PA	0.006	540.353
8249	*No hits found*	0	540.989
1157	*No hits found*	0	541.897
932	*No hits found*	0	543.293
4324	predicted protein	0.003	543.484
5531	Kynurenine 3-monooxygenase and related flav...	4e-22	543.965
3307	protein with PPR repeats	2e-23	544.231
6183	cisplatin resistance-associated overexp...	3e-20	544.488
4426	HMG-protein	7e-06	545.544
8758	PREDICTED: similar to alkB, alkylation ...	1e-40	546.119
8454	NOP56 (ARABIDOPSIS HOMOLOG OF NUCLEOLAR PR...	3e-15	547.286
500	PREDICTED: similar to Integrin beta-7 prec...	0.44	547.668
6145	hypothetical protein UM03494.1	1.8	547.746
3255	pentatricopeptide (PPR) repeat-containing ...	5e-24	548.137
4088	conserved hypothetical protein	0.009	548.909
11039	PREDICTED: similar to hepatocellular carci...	1.1	549.217
7496	protein serine/threonine kinase, putati...	1.4	549.221
8405	zinc finger/thioredoxin putative	0.0001	549.358
6161	hypothetical protein MlutDRAFT_2088	1	551.372
2296	Sir2 family protein	3e-22	553.564
326	Tetratricopeptide TPR_2 repeat protein ...	3.8	553.773
234	poly(adp-ribose) glycohydrolase	6e-32	554.691
5303	keratin associated protein 9.2	0.39	556.528
5801	hypothetical protein EUBVEN_00105	0.88	557.545
9942	RNA methylase-like protein CR004	1e-22	557.652
661	PREDICTED: similar to Forkhead box N3	6.5	557.925
5249	oligoendopeptidase F	2.1	558.088
6140	unnamed protein product	0.018	558.813
3973	predicted mitochondrial protein	4e-33	559.014
1997	cytoplasmic basic protein	0.003	559.456
1335	hypothetical protein LELG_02536	8.6	559.635
3519	AGAP007118-PA	3.3	560.365
2925	methyl-accepting chemotaxis protein	1.7	560.845
5223	PREDICTED: similar to CSRP2 binding pro...	4.8	561.852
9994	C01G12.7	1	561.902
5003	hypothetical protein containing tetratr...	1.7	561.925
11674	hypothetical protein OsI_024836	0.054	562.971
559	eukaryotic translation initiation factor 4A...	3e-49	563.647
6733	60S ribosomal protein L19	0.006	564.088
3938	*No hits found*	0	564.555
8623	conserved hypothetical protein	0.0005	564.59
9843	TIPARP protein	1e-08	565.58
9056	conserved hypothetical protein; putativ...	0.52	566.626
363	hypothetical protein AN1213.2	0.2	567.765
8468	gufA protein	1.9	568.031
3341	HSP90-like protein	3e-61	569.333
5193	chitinase, putative	0.014	570.445
4230	PREDICTED: similar to DVL-binding protein ...	4e-09	570.473
1530	*No hits found*	0	570.757
6080	putative oxidoreductase (zinc-containin...	1e-29	570.82
2131	endonuclease/exonuclease/phosphatase famil...	2e-17	572.041
7104	hypothetical protein CHGG_08804	2.5	572.567
6251	hypothetical protein OsI_002781	0.022	573.497
8049	mitogen activated protein kinase kinase 4	0.5	574.335
11359	Putative Lex2B protein (lipooligosaccharid...	0.032	574.49
8032	2'-5'-oligoadenylate synthetase-like	0.084	575.421
5598	hypothetical protein SAV_2158	0.13	576.069
3530	hypothetical protein BAL199_17418	2e-30	576.518
2056	hypothetical protein Kpol_530p13	3.8	579.259
11277	LndJ	5.3	580.592
1916	*No hits found*	0	581.35
8398	scaffold attachment factor A	2e-10	581.357
561	phytanoyl-CoA dioxygenase PhyH family prot...	2e-14	582.034
1033	transmembrane protein	0.2	582.57
10928	hypothetical protein with possible transme...	5e-30	582.578
6446	PREDICTED: hypothetical protein	0.27	583.837
2607	non-ribosomal peptide synthase	1e-09	583.894
7340	hypothetical protein TTC1846	0.58	584.266
262	aquaporin-like protein	0.64	585.906
9953	predicted protein	0.001	585.935
3848	*No hits found*	0	585.983
5189	hypothetical protein KAOT1_11236	0.014	586.724
749	*No hits found*	0	586.978
1236	major basic nuclear protein	3e-27	587.515
2729	lipoprotein, putative	5e-11	587.727
2133	AAA ATPase domain-containing protein	1e-11	588.148
618	TPR domain protein	0.002	588.269
5251	hypothetical protein cgd2_680	0.18	588.278
9002	hypothetical protein CLOLEP_01353	1.4	588.559
3478	hypothetical protein CLOSCI_03421	2.3	588.892
2578	SCO-spondin	0.17	589.729
1219	putative NMDA receptor glutamate-binding cha...	0.013	589.778
7122	hypothetical protein GSPATT00030216001 ...	0.36	589.929
4884	hypothetical protein SS1G_12368	0.75	590.302
9297	hypothetical protein PVX_116675	0.39	591.442
3556	predicted mitochondrial protein	2e-33	591.594
3502	hypothetical protein LOC_Os10g30270	0.056	592.577
4912	hypothetical protein Tc00.1047053506815.40...	0.0002	592.812
11471	Clan CA, family C19, ubiquitin hydrolas...	4.6	593.439
3042	*No hits found*	0	593.487
5478	hypothetical protein OsI_019065	0.17	594.462
8288	predicted protein	0.0003	594.722
8464	hypothetical protein Swit_3302	3	595.142
2329	hypothetical protein Tc00.1047053507809.11...	0.22	596.552
8138	S-layer-related protein precursor >gi|...	0.16	597.185
8215	Os12g0568900	0.17	598.078
3035	HSP90-like protein	6e-56	598.665
6977	Spindle pole protein, putative	0.008	598.821
2683	hypothetical protein SNOG_03319	2.9	599.556
1920	*No hits found*	0	599.793
10721	unnamed protein product	6.6	601.286
4553	predicted protein	0.032	603.461
8394	predicted mitochondrial protein	1e-23	606.574
757	AGAP010686-PA	6.6	606.911
2571	PREDICTED: similar to soluble guanylyl cyc...	6e-26	608.134
6531	Chromosome segregation ATPases-like prot...	7e-28	609.308
1437	Leishmanolysin family protein	0.59	609.389
3092	*No hits found*	0	610.288
4800	lipoprotein, putative	0.028	610.677
3977	COG1413: FOG: HEAT repeat	2e-12	611.811
3994	conserved hypothetical protein	0.001	612.812
642	hypothetical protein P9211_15381	1e-21	613.788
8573	hypothetical protein, conserved	0.01	616.026
4413	conserved hypothetical protein	0.002	616.926
11308	predicted protein	0.0002	617.126
2959	unknown	0.0005	617.141
7581	EBNA-2	0.006	617.841
7174	hypothetical protein CBG09799	0.015	618.254
4316	hypothetical protein Amet_0284	0.24	618.784
3383	PREDICTED: similar to FLJ36874 protein ...	1.3	618.837
2990	AIG1 family protein	0.67	619.394
373	calcium-dependent protein kinase 1	0.023	619.741
2135	hypothetical protein GSPATT00016149001 ...	0.003	620.835
10677	PREDICTED: similar to TSP-EAR protein	1e-12	622.132
10460	hypothetical protein OsI_006672	0.01	622.304
1485	hypothetical protein alr7089	3.7	622.604
4744	RNA-binding region-containing protein (RNP...	9e-17	622.644
2961	polyprotein	8.8	622.86
1933	WD-40 repeat protein	2e-43	623.399
5970	aggrecan	0.015	623.991
4597	PREDICTED: similar to Cgi67 serine proteas...	3e-20	624.651
6929	hypothetical protein VspiD_30155	4e-05	625.159
4742	DnaK family protein	3.1	625.841
7022	hCG21538, isoform CRA_a	0.77	626.025
862	Glycoside hydrolase, family 19	3.8	626.88
1925	UDP-glucose:anthocyanidin 3-O-glucosyltrans...	2.2	627.572
5268	hypothetical protein	0.41	627.952
6415	predicted protein	0.96	628.187
8870	MFS transporter	3e-05	628.467
218	hypothetical protein sce8682	2.3	629.883
1550	40S ribosomal protein S25	0.0007	631.114
1777	PREDICTED: similar to proprotein conver...	2.4	631.574
7987	PREDICTED: hypothetical protein	0.003	631.831
7118	PREDICTED: hypothetical protein	1.1	632.728
1450	RNA methyltransferase, TrmH family, grou...	5	632.959
8170	serine/threonine protein kinase	1.4	634.076
5459	hypothetical protein, conserved	0.051	634.645
2061	hypothetical protein GSPATT00039656001 ...	0.007	636.429
2339	SET domain protein	7e-05	636.651
11121	bifunctional glycosyltransferase	2e-17	637.232
11592	pteridine transporter, putative	4e-06	637.341
9700	predicted protein	0.0003	637.629
8726	CG31752 CG31752-PA	2.7	637.984
456	hypothetical protein HQ3110A	0.51	638.129
7733	Dual specificity protein phosphatas...	1e-16	638.749
9273	hypothetical protein LOC791209	0.002	639.18
3514	conserved hypothetical protein	0.0003	640.212
1176	hypothetical protein VNG2185H	5	640.449
7088	S1L	0.0008	640.683
9137	alpha/beta hydrolase fold	0.0002	641.072
10163	ORFW	0.095	641.759
8388	Hypothetical protein CBG14595	0.005	641.851
11289	EF hand family protein	2e-07	642.151
1474	PREDICTED: zinc finger protein 649	1.1	642.168
714	ribosomal protein S14	2.1	642.262
7394	PREDICTED: hypothetical protein	0.2	642.434
355	hypothetical protein GSPATT00024201001 ...	0.12	643.701
11738	conserved hypothetical protein	0.14	644.101
7720	putative thiamine biosynthesis lipoprot...	0.09	645.234
3963	hypothetical protein OsJ_006614	0.23	645.662
11892	pasticcino 1	2e-12	646.286
11145	NUDIX hydrolase	0.007	646.998
1338	SET domain containing protein	0.007	647.262
10810	unknown	2	647.411
8385	PREDICTED: hypothetical protein	0.04	648.481
679	SJCHGC06605 protein	0.55	648.523
10958	cobalamin synthesis protein	2e-10	649.751
6746	hypothetical protein UM05682.1	0.37	649.814
8626	Acid phosphatase	3e-05	650.847
1013	2-polyprenyl-3-methyl-5-hydroxy-6-metoxy-1,4...	8e-08	651.888
780	nitrate transporter	2e-45	651.927
11382	PREDICTED: hypothetical protein	0.13	652.055
2788	HEAT domain protein repeat-containing p...	2e-15	652.615
2100	dual specificity protein phosphatase, p...	2.3	653.057
3015	p53 binding protein	1e-14	653.411
3845	PREDICTED: hypothetical protein	2.9	654.93
338	kinesin K39, putative	0.11	655.966
6358	predicted protein	0.0002	656.336
4913	Poly polymerase and DNA-Ligase Zn-finge...	5e-07	657.428
6565	hydroxyanthranilate hydroxycinnamoyltransfe...	2e-06	658.582
387	YOD1 OTU deubiquinating enzyme 1 homolo...	4e-20	658.866
6775	predicted permease	3	659.225
11753	unnamed protein product	1.5	660.1
7082	PREDICTED: similar to fibropellin c	1e-32	660.753
1190	PREDICTED: similar to B-aggressive lymphom...	0.0001	661.589
8967	PREDICTED: hypothetical protein	0.31	661.919
8142	sarcalumenin	0.51	661.977
2189	hypothetical protein NIS_1117	0.11	665.349
9727	PBS lyase HEAT domain protein repeat-co...	0.021	665.372
11314	TPA_inf: HDC03502	0.69	665.442
11607	predicted protein	2.9	665.495
10751	AGAP002952-PA	0.15	666.228
5694	hypothetical protein, conserved	3.9	666.681
980	PREDICTED: similar to transcription factor...	1.4	667.42
8777	saccharopine dehydrogenase	2e-14	668.31
4786	Phosphoglycerate mutase	6e-22	668.348
5838	Hypothetical protein CBG03928	0.001	668.614
9030	ribosomal large subunit pseudouridine synt...	2e-13	669.662
4736	hypothetical protein FG05073.1	0.11	671.222
3270	putative type III effector protein with ppr...	3e-12	671.256
8934	oxidoreductase, acting on paired donors, w...	1e-08	671.881
6428	PREDICTED: similar to Josephin domain cont...	1e-06	671.895
8712	YrhL	0.02	672.129
1509	*No hits found*	0	672.676
6353	glycosyltransferase family-like protein...	0.009	674.17
6108	predicted protein	1e-07	675.727
1640	predicted protein	0.0009	676.321
9614	protein complex assembly-relatedprotein	0.099	676.462
3334	hypothetical protein DUF323	1.2	677.066
871	PUTATIVE PPR REPEATS CONTAINING PROTEIN	5e-11	677.081
95	*No hits found*	0	678.002
4139	conserved hypothetical protein	1	678.54
8957	hypothetical protein DSM3645_16675	4e-11	679.632
8937	probable arylamine N-acetyltransferase pro...	1e-19	679.853
519	kinesin-associated mitochondrial adaptor pro...	0.69	681.426
6430	predicted protein	1.8	681.737
5655	unnamed protein product	0.43	681.75
10378	probable cytochrome c precursor	3	682.548
10801	tRNA pseudouridine synthase A	4e-21	683.082
987	copper radical oxidase	0.038	683.817
3397	PREDICTED: similar to ankyrin 2,3/unc44	2e-08	683.886
7226	LD16331p	0.12	683.96
2322	unknow protein	3e-28	684.913
7814	Ku family containing protein	0.21	685.814
5285	hypothetical protein, conserved	2.4	686.205
859	GCN5-related N-acetyltransferase	9e-07	686.679
5413	PREDICTED: hypothetical protein	0.16	687.017
4709	hypothetical protein Tc00.1047053508693.19...	0.22	687.627
6953	predicted protein	0.027	688.4
10931	transcriptional regulator, Sir2 family ...	8e-12	688.492
1193	WD-repeat protein	8e-19	689.233
5343	predicted protein	2.2	690.211
3477	GTP-binding protein, putative	1e-21	690.408
3581	PREDICTED: similar to ankyrin 2,3/unc44...	8e-05	690.605
2190	Slc16a4 protein	0.01	693.121
10785	voltage-gated sodium channel Nav1.4b	9e-05	693.17
5297	S-adenosyl-methyltransferase MraW	1e-33	694.297
11543	dehydrogenase, E1 component	1.9	695.891
8526	FK506 binding protein 5	2e-17	696.176
11394	SET domain containing protein	2e-09	696.887
823	ankyrin 2,3/unc44	4e-17	697.627
1120	60S ribosomal protein L26	2e-44	697.67
1839	proteophosphoglycan 5	0.0003	699.468
466	echinonectin	7e-11	699.537
8551	predicted protein	2.9	700.324
2719	PREDICTED: similar to Thrombospondin ty...	3e-05	702.188
3028	hypothetical protein Chro.70547	2e-08	702.426
1969	Mg-dependent phosphatase	5e-17	703.43
2688	*No hits found*	0	703.852
1883	PREDICTED: similar to apolipoprotein A-...	3	705.537
5677	unnamed protein product	1e-24	705.585
904	telomere-associated RecQ helicase	1.3	705.769
4984	hypothetical protein An13g00980	0.11	706.68
7370	hypothetical protein OsJ_029003	0.87	708.026
8444	RNase P subunit p30 family protein	2e-19	708.966
4832	Ion transport protein	0.0003	709.008
5567	*No hits found*	0	709.363
2892	prominin 1	0.21	711.364
4056	hypothetical protein OsI_010960	0.0002	711.443
7255	putative outer membrane lipoprotein-sor...	0.0006	711.84
5654	calcium-dependent protein kinase	7e-07	712.571
711	ankyrin repeat protein, putative	2e-07	714.097
3804	MFS family transporter: sugar	7e-08	714.147
6291	unnamed protein product	3e-12	715.483
6753	Apolipoprotein A1/A4/E	4e-08	718.121
8211	RNA-binding protein, putative	1e-11	718.48
11571	*No hits found*	0	720.316
6302	RNA polymerase II largest subunit	0.39	720.36
1337	putative NUDIX hydrolase	0.48	721.737
9174	SJCHGC01919 protein	0.076	722.071
1912	PREDICTED: similar to conserved nuclear pr...	0.001	722.895
6474	unnamed protein product	2.3	723.479
3635	polyprotein	1.8	723.85
2415	TfoX domain protein	0.59	725.075
11703	xylulokinase	0.35	728.216
3216	hypothetical protein UM03810.1	0.27	728.371
2385	hypothetical protein MAL8P1.124	0.014	728.782
2619	*No hits found*	0	729.054
8913	prolyl 4-hydroxylase alpha-1 subunit precur...	2e-13	730.918
1180	PREDICTED: similar to hect domain and R...	0.2	731.559
9027	predicted protein	1e-05	732.252
8854	hypothetical protein OsJ_000077	0.24	732.374
9335	hypothetical protein Mbar_A2594	0.13	732.606
9419	hypothetical protein TVAG_043430	0.14	733.008
1362	threonyl-tRNA synthetase-like 1, isoform CRA...	6.5	733.048
2836	RNA-binding protein	4e-08	733.052
5922	predicted protein	1.4	734.161
2671	B4 gene product	4.9	734.335
8709	ORF 73	4e-12	735.766
7486	oxidoreductase, acting on paired donors, w...	1e-27	736.711
10774	hypothetical protein OsJ_022781	0.47	737.212
3817	predicted protein	9e-12	737.217
249	3'-5' exonuclease, putative (ISS)	2e-22	739.366
7381	DNA translocase FtsK	0.11	739.828
383	putative U1 small nuclear ribonucleopartic...	4e-13	739.868
10193	predicted protein	0.028	739.929
5487	VmcA	0.0001	740.401
11045	preprotein translocase, SecA subunit	4e-63	740.807
1599	S-adenosyl-L-homocysteine hydrolase	7e-10	741.014
470	hypothetical protein LOC734942	0.65	741.061
5946	hypothetical protein AmucDRAFT_1048	0.03	741.819
2610	hypothetical protein AFUA_6G00193	1.3	742.082
11470	a-agglutininanchorage subunit	0.37	742.087
7011	unnamed protein product	6.2	742.657
8371	putative racemase	1e-33	743.352
5787	unnamed protein product	0.55	744.576
3350	translation elongation factor P	1e-60	745.223
2568	HSP90-like protein	2e-27	745.293
1536	protein disulfide-isomerase-likeprotein EhS...	1e-40	745.436
128	putative outer membrane protein	0.45	745.441
11682	oxidoreductase, 2OG-Fe(II) oxygenase famil...	6e-13	745.858
8208	unknown	0.013	746.494
1921	PREDICTED: similar to tenascin-R (restrict...	3.8	749.707
5539	capsule polysaccharide biosynthesis protei...	4e-10	751.078
8054	hypothetical protein BBOV_III009540	0.44	751.283
4515	putative ATP/GTP binding protein	5e-30	753.061
5665	hypothetical protein GK1414	8e-07	753.282
2132	hypothetical protein LELG_01049	8.2	754.301
6868	hypothetical protein NCU02681	0.018	755.136
3931	hypothetical protein CC1G_08642	0.32	756.306
10275	*No hits found*	0	756.982
8383	Alpha-2-macroglobulin-like	4.9	757.467
10688	putative 2-hydroxy-6-oxohepta-2,4-dienoate...	0.0004	758.552
2267	hypothetical protein TP01_0148	2e-06	760.386
482	PREDICTED: similar to Jumonji domain co...	6e-06	760.616
3644	putative exopolyphosphatase	1e-22	760.952
2536	PREDICTED: similar to hCG1642996	0.038	761.142
8045	vegetative cell wall protein gp1-like	0.46	761.56
7353	suppressor of ascus dominance	1e-08	761.897
3836	methionine aminopeptidase 1, putative, expre...	2e-33	762.628
3243	hemolysin	6e-07	766.912
322	transcription factor protein	5e-12	766.928
4005	Kynurenine 3-monooxygenase and related flav...	3e-21	767.434
8188	hypothetical protein PVX_114745	0.0006	768.661
3646	PREDICTED: similar to mitochondrial car...	0.34	768.758
3908	Serine/arginine-rich protein	0.001	769.23
1104	hypothetical protein CNL06150	1.6	769.422
6872	myosin heavy chain	0.0008	769.711
978	unnamed protein product	0.11	770.113
8151	PREDICTED: similar to cystin cilia-associa...	0.37	770.457
4125	putative makorin RING finger protein (ISS) ...	0.001	770.915
9663	MJ0710-like (thump + methylase domains). R...	5e-27	771.005
7343	unnamed protein product	0.75	772.034
6628	hypothetical protein MAP0314	0.91	772.934
1553	CR16	0.035	773.323
3127	PREDICTED: similar to rCG63049	6.1	773.374
816	conserved hypothetical protein; putative e...	0.003	773.424
9046	unnamed protein product	0.25	774.296
7997	viral A-type inclusion protein, putativ...	2e-06	776.092
10914	*No hits found*	0	777.614
11826	cysteine repeat modular protein 2 homologu...	1e-08	778.249
2600	hypothetical protein	0.6	779.175
10266	integrase family protein	0.99	779.711
6874	PREDICTED: similar to conserved hypothe...	0.5	779.995
10168	hCG2041351	1	780.15
2023	*No hits found*	0	780.891
591	hypothetical protein	0.059	781.014
2514	PREDICTED: similar to zinc finger protein ...	0.0002	781.463
721	hypothetical protein Chro.50027	8.6	782.551
11932	C-type lectin (ISS)	9e-12	783.021
8509	glycoprotein 96-92	0.0002	784.183
8926	protein disulfide isomerase	7e-22	784.464
3293	pentatricopeptide (PPR) repeat-containing ...	1e-16	784.696
5513	potassium channel tetramerisation domai...	7e-07	785.105
4450	diguanylate cyclase (GGDEF domain)	1.3	785.656
8343	putative nucleoside hydrolase	2e-27	785.962
9177	high-affinity nickel-transporter	0.18	786.062
273	methyltransferase	1e-06	786.467
6286	Zinc finger, C2H2 type family protein	2e-13	786.49
9734	PREDICTED: hypothetical protein	0.23	786.584
9087	hypothetical protein NEMVEDRAFT_v1g1540...	2.1	787.809
608	Glycosyl transferase, family 31	1e-05	788.958
10093	hypothetical protein AN7693.2	0.16	789.214
9140	PREDICTED: similar to very large induci...	2e-17	789.451
5724	penicillin-binding protein	0.58	790.403
1502	unknown	1.3	791.888
2634	major facilitator family transporter	3.8	792.614
3483	unknown	2e-11	793.355
455	PREDICTED: similar to conserved hypothetic...	1e-12	795.355
5534	predicted protein	0.025	795.997
3044	predicted protein	0.001	796.253
271	hypothetical protein GSPATT00015181001 ...	4.4	796.544
6503	PREDICTED: similar to dumpy CG33196-PB	0.62	796.842
8008	hypothetical protein BBOV_I000570	2e-23	798.088
7621	PREDICTED: similar to P-element somatic in...	2e-10	798.132
6309	Cdc42 effector protein 4	0.31	798.299
4481	haloacid dehalogenase-like hydrolase	3e-11	798.982
5802	lipoprotein, putative	2e-27	798.997
10128	hypothetical protein NCU08349	1.3	799.056
1103	hypothetical protein SAV_4300	6.5	799.237
2074	similar to MEGF12 (predicted)	0.1	800.397
284	SH3 type 3 domain protein	0.047	801.863
4207	*No hits found*	0	801.932
5404	hypothetical protein	0.33	802.506
7398	band 7/Mec-2 family protein	0.48	803.084
3225	putative Rhs protein	0.58	803.668
8538	predicted protein	2e-12	803.711
4639	predicted protein	2e-05	803.727
9246	unnamed protein product	0.053	804.84
1639	S-adenosylmethionine-dependent methyltra...	0.011	804.96
9313	outer membrane protein	1.7	805.344
1006	hypothetical protein MSMEG_0767	1.7	805.724
4685	Transcriptional regulator SNIP1, contains F...	0.003	805.918
3432	putative alpha-mannosidase	2.2	806.823
7898	Hypothetical protein CBG00969	0.02	807.029
6244	YTH domain containing 2, isoform CRA_a	3e-08	809.336
6327	PREDICTED: similar to Keratin associate...	0.74	809.737
139	leucine zipper-, EF-hand motif- containing ...	4	810.745
4237	Sel1 domain protein repeat-containing pr...	0.049	811.187
5400	AcetylCholine Receptor family member (acr-...	6e-15	811.195
1476	hypothetical protein An02g07380	5.1	811.5
2630	hypothetical protein NCU11146	4.9	811.595
2338	Rab-like protein 5 >gi|67971256|dbj|B...	5e-23	812.447
7559	Succinylglutamate desuccinylase/asparto...	4e-15	813.054
7701	single-stranded nucleic acid binding R3H	6e-21	813.193
962	dienelactone hydrolase	6.2	813.413
1312	unnamed protein product	0.29	814.031
4836	COG0546: Predicted phosphatases	0.27	814.507
934	carbohydrate kinase family	3e-16	814.756
8369	PREDICTED: similar to mitochondrial carrie...	0.8	815.07
655	amidohydrolase 2	4e-12	815.11
4126	60S ribosomal protein L19 protein	3e-41	815.304
10076	flagellar biosynthesis protein FliP	1.3	815.409
1747	PREDICTED: similar to tetratricopeptide...	0.54	815.59
7535	protein kinase, putative	0.071	815.79
9538	MOSC domain protein	5e-10	816.161
5540	unnamed protein product	0.13	816.732
216	PREDICTED: similar to Cuticle protein 2...	4e-06	816.81
2498	signal recognition particle-docking prot...	5e-05	816.889
5364	putative secreted protein with basic tail	1.4	817.481
11225	hypothetical protein Acid345_1104	0.68	817.684
10078	ATP synthase F1, alpha subunit	8e-19	817.729
6717	neurobeachin/beige-like protein, putative ...	1.1	818.302
815	2-hydroxychromene-2-carboxylate isomerase ...	2e-34	818.963
2986	cytosolic adenylate kinase protein precursor...	1e-105	820.446
1658	uncoordinated protein	0.019	820.585
8616	adenosine/AMP deaminase family protein	2e-12	820.635
3716	predicted protein	0.76	821.335
8126	PREDICTED: hypothetical protein	2	821.9
6429	SH3 type 3 domain protein	4e-08	822.716
1225	exodeoxyribonuclease III Xth	0.45	822.911
11757	multi antimicrobial extrusion protein M...	2.6	823.034
6880	hypothetical protein OsI_037311	0.044	823.881
1360	*No hits found*	0	826.406
8162	ABC transporter related	0.44	826.989
7868	PREDICTED: similar to splicing factor 3a, ...	0.25	827.177
7758	Ion transport protein	0.093	827.625
7969	transcriptional regulator, LysR family, ...	3.5	827.936
1142	putative type III effector protein with ppr...	3e-12	827.981
2513	conserved hypothetical protein	3e-80	828.141
10619	cell surface receptor IPT/TIG domain pr...	2	828.342
10730	transcriptional regulator, TetR family p...	0.46	828.894
9068	lipoprotein, putative	9e-15	829.196
1118	PREDICTED: hypothetical protein	0.19	829.786
7505	unknown	0.003	829.902
9867	predicted protein	0.002	830.418
11764	LUC7-like	9e-17	830.812
10477	putative cyclase	6.6	831.066
7085	hypothetical protein	1e-44	831.488
10380	protein of unknown function DUF72	2e-06	832.466
9088	DNA polymerase, beta-like region	0.72	833.428
11079	conserved hypothetical protein	5e-05	834.353
3902	PREDICTED: similar to Adiponectin recep...	3e-06	834.739
899	*No hits found*	0	834.912
3852	SOBER1	1e-24	835.982
428	maturase	0.59	836.283
11783	Protein of unknown function (DUF636) famil...	4.9	836.319
8319	AGAP006038-PA	0.11	836.355
5363	PREDICTED: Werner syndrome	1e-12	836.844
11132	rRNA methylase	1e-16	837.283
1953	PREDICTED: similar to TCHP protein	2e-19	837.422
6027	fungal specific transcription factor, p...	0.048	838.739
8390	zinc finger protein Bpb1	0.013	839.33
11708	PREDICTED: similar to Em:AC005006.4 isofor...	0.53	839.832
6539	Os09g0296700	0.001	840.063
136	hypothetical protein GTNG_1655	0.64	840.098
6003	PREDICTED: similar to gem (nuclear orga...	0.084	841.066
6816	putative integron gene cassette protein	2e-09	841.53
4655	unnamed protein product	0.056	842.048
483	TonB-dependent copper receptor	2.5	842.312
9886	ankyrin repeat protein, putative	2e-15	842.409
8145	unnamed protein product	0.027	842.953
3086	hypothetical protein CHLREDRAFT_151988 ...	9e-17	843.072
11226	OmpA family protein	0.017	843.766
8636	PREDICTED: similar to hCG1987869, parti...	0.01	843.831
6982	2-methylcitrate synthase/citrate synthas...	0.19	843.954
8481	hypothetical protein OsI_029917	2e-16	844.019
6668	oxidoreductase	2e-38	844.025
1397	hypothetical protein Franean1_0154	3.9	844.733
1987	methyltransferase, FkbM family	0.066	844.818
2069	PREDICTED: similar to Formin-1 isoform IV ...	6e-27	844.829
11920	Os01g0821700	0.003	846.648
2437	PDZ-signaling protein	0.068	846.759
1794	Elav	0.0002	846.886
2641	*No hits found*	0	847.323
625	protein kinase, putative	5.9	847.465
5684	hypothetical protein STIAU_8355	0.006	847.588
1460	Endonuclease/Exonuclease/phosphatase family ...	9e-10	847.618
4268	calcium-activated potassium channel	5e-29	847.656
2467	unknown	3e-25	848.001
6605	COG2319: FOG: WD40 repeat	5e-18	848.416
5836	hypothetical protein GSPATT00021845001 ...	0.0004	848.422
594	structural maintenance of chromosomes 1B	1.2	849.147
4854	imidazolonepropionase	9e-66	849.373
3378	mCG133587	1.3	849.501
10195	hypothetical protein BACUNI_03963	1e-46	849.644
9941	hypothetical protein LinJ30.1320	0.81	849.817
1440	hypothetical protein Mmc1_2798	0.26	850.543
2231	Lytic transglycosylase, catalytic	0.48	850.616
8950	neuraminidase	2e-16	850.666
11332	hypothetical protein amb3865	2.8	850.786
7120	ATP-binding cassette, sub-family C, member 2...	2e-35	850.969
5134	Kynurenine 3-monooxygenase and related flav...	2e-30	851.901
1631	PREDICTED: HECT, C2 and WW domain containi...	5	852.729
6255	hypothetical protein PC102167.00.0	3e-05	853.059
2809	hypothetical protein MGG_01078	0.17	853.228
1998	220 kDa silk protein	0.078	853.602
6206	cAMP-binding protein - catabolite gene a...	1e-05	853.657
5721	hypothetical protein, conserved	0.27	854.854
3724	RNA recognition motif (RRM)-containing pro...	6e-05	855.055
11438	hypothetical protein GSPATT00014468001 ...	0.0001	855.767
9315	Kef-type K+ transport system, NAD-bindin...	3e-07	856.107
4314	*No hits found*	0	856.201
2239	Os07g0417800	0.21	856.287
7254	predicted protein	0.002	856.492
10970	PREDICTED: hypothetical protein	0.95	856.981
1178	*No hits found*	0	858.038
9091	hypothetical protein BACUNI_00102	3e-05	858.153
418	Cas/HEF-like protein 1	0.39	859.265
7849	hypothetical protein PY04694	0.015	859.554
6608	KH domain containing protein	5e-06	859.786
747	hypothetical protein MGG_02478	1.3	860.363
6616	PREDICTED: similar to tropomodulin 2	2e-09	860.995
3223	hypothetical protein SNOG_01494	0.0009	861.081
4971	putative RNA helicase, DRH1 (ISS)	7e-27	861.547
5078	predicted protein	3e-11	861.957
10439	*No hits found*	0	861.978
2965	hypothetical protein BBOV_IV009990	0.004	862.369
8366	transport system permease protein	0.31	862.382
3012	hypothetical protein OsI_004805	0.001	862.468
8339	No definition line found	0.094	862.536
5897	PREDICTED: similar to biphosphate nucle...	2e-17	862.938
2964	hypothetical protein Chro.10359	2e-07	863.056
9397	mCG124923	7.5	863.561
7227	aconitate hydratase	0.36	863.585
8193	hypothetical protein MXAN_7229	0.24	864.444
5538	phycocyanin alpha phycocyanobilin lyase re...	2e-05	865.346
1487	PREDICTED: similar to keratin associate...	0.006	866.017
9216	PREDICTED: similar to putative amino ac...	0.013	866.344
6711	PREDICTED: hypothetical protein	0	866.384
9878	SWF/SNF family helicase	2e-07	867.118
197	PREDICTED: hypothetical protein, partia...	0.0002	869.02
11058	Hypothetical protein CBG14603	0.0003	869.336
3426	PREDICTED: similar to calicin	2.9	870.044
11781	transcriptional regulator	2.6	870.567
1439	PREDICTED: hypothetical protein	0.53	870.575
8940	diguanylate cyclase/phosphodiesterase w...	0.26	870.788
3496	f-172-1_1	0.18	871.387
1421	amino acid transporter	1e-06	871.816
10437	Methyltransferase type 12	2e-06	871.821
2303	phosphate dependent sugar aminotransferase	1e-126	871.842
3061	integrin, beta-like 1	1.7	872.397
7468	PREDICTED: hypothetical protein, partia...	0.28	872.558
2421	PepSY-associated TM helix domain protei...	4.9	872.829
11536	predicted protein	0.014	873.013
11916	hypothetical protein FG01107.1	0.038	873.018
10366	Amidases related to nicotinamidase	3e-32	873.543
953	CG7886 CG7886-PA	0.69	874.587
1170	*No hits found*	0	875.382
2088	*No hits found*	0	875.509
9247	heat shock protein DnaJ domain protein	1e-10	875.808
1036	short-chain dehydrogenase/reductase SDR...	2	875.885
765	ORF137	6e-16	875.887
1650	chloroplast light harvesting protein isoform...	3e-16	876.324
6518	hypothetical protein LOC724000	0.022	876.823
10321	TRAP-T family transporter, DctM (12 TMs)...	5.1	877.004
374	transcriptional regulator, SARP family ...	0.19	877.534
6384	competence protein	0.21	877.538
2482	hypothetical protein AaeL_AAEL001339	0.38	878.241
3913	hypothetical protein LJ1145	1	879.014
11467	Y48G10A.1	0.004	879.437
6720	*No hits found*	0	881.977
10592	galactokinase	2e-23	883.354
4513	mCG141708, isoform CRA_a	0.003	883.524
6215	DEAD/DEAH box helicase	8e-09	883.777
5704	putative serine-threonine protein kinase	0.042	884.42
11361	hypothetical protein NCU07277	0.82	884.538
6689	unnamed protein product	1.5	885.021
9938	Hypothetical protein CBG14603	0.003	885.057
9263	bifunctional cbiH protein and precorrin-...	4.6	885.872
405	type III effector HopI1	6e-06	886.334
9111	hypothetical protein Tb11.01.3670	5.7	886.972
3101	guanyl nucleotide exchange factor Sql2	0.002	887.19
9242	unnamed protein product	0.9	887.839
11700	predicted protein	2.5	888.497
11155	retrotransposon protein, putative, Ty3-gypsy...	0.033	889.244
7667	aldehyde dehydrogenase	5e-79	889.624
8494	hypothetical protein PBAL39_01562	0.59	890.119
8790	PREDICTED: hypothetical protein	0.35	890.676
11283	pirin, N-terminal:Pirin, C-terminal	3e-47	890.795
11499	PucF	1.2	890.959
11092	DnaJ-class molecular chaperone	1e-11	890.986
4620	MGC53673 protein (ISS)	1e-38	891.223
2670	hypothetical protein RUMOBE_03928	0.62	891.277
6756	calcium-dependent protein kinase	9e-21	891.684
9127	PREDICTED: similar to ankyrin 2,3/unc44...	9e-14	892.13
9932	predicted protein	0.012	892.434
1516	MltA domain protein	6.4	892.7
9473	chaperone protein	0.82	893.041
3860	dehydrogenase MVIM-sugar aminotransferase fu...	3e-38	893.21
986	transcription regulator PAB1642	0.46	893.491
2710	heavy metal efflux pump CzcA, putative	0.6	893.576
828	disulfide-like protein >gi|1092589|prf||2024...	6e-21	893.639
5730	nucleolar protein	2e-07	893.669
3390	PREDICTED: similar to centrosomal protein ...	0.011	894.298
7750	RH74443p	0.12	895.257
9070	hypothetical protein RSP_6235	0.001	896.873
6432	excinuclease ABC, A subunit	0.19	899.05
3006	surface protein, LPXTG-motif cell wall anc...	2e-07	899.606
7407	hypothetical protein	5.4	900.98
5784	Cupin 4 family protein	5e-09	901.695
7893	PREDICTED: similar to DDHD domain conta...	1e-18	903.053
6486	PREDICTED: hornerin isoform 1	0.038	904.241
2368	PREDICTED: similar to EGF-like, fibrone...	0.21	904.695
8168	clottable protein	0.92	905.239
3690	DNA-directed RNA polymerase I subunit R...	9e-31	905.482
5849	F7N22.14 gene product	2.5	905.512
9500	component of oligomeric golgi complex 4...	3e-18	907.57
4194	hypothetical protein	0.23	908.283
5416	protein kinase, putative	8.5	908.579
9278	Protein of unknown function DUF1639	1.6	908.765
6739	unnamed protein product	0.55	909.092
3518	MGC84269 protein	0.002	909.101
7339	leucine-rich-repeat protein	4e-07	909.801
11732	PREDICTED: hypothetical protein	0.006	910.089
5265	appr-1-p processing enzyme family prote...	2e-06	910.24
9551	Hypothetical protein CBG23547	0.008	910.928
11546	FHA domain containing protein	0.011	911.037
2649	hypothetical protein SNOG_12495	6.4	911.323
5674	ATPase	1e-22	911.467
11889	EF hand family protein	0.0002	911.469
10939	F31C3.6a	2.3	911.686
9267	glycosyl transferase, family 8	1.3	913.205
4967	PREDICTED: similar to ubiquitin A-52 re...	0.94	913.72
7228	Sporulation related	0.0001	913.911
8276	hypothetical protein MA2043	0.041	914.158
8086	PBS lyase HEAT-like repeat protein	4e-18	914.746
11075	GA19604-PA	0.24	916.113
442	Alpha/beta hydrolase fold-3 domain prot...	4e-23	916.185
2278	*No hits found*	0	917.199
3481	extracellular solute-binding protein, fami...	0.008	918.243
5187	conserved hypothetical protein	0.19	918.305
6232	5 transmembrane domain proteiin	2e-08	918.414
5793	PREDICTED: similar to prp4	5e-12	919.93
7983	Hypothetical protein CBG11506	1.9	920.962
11574	predicted protein	0.009	922.155
11234	hypothetical protein	1.4	923.043
2592	methionine sulfoxide reductase B	7e-18	923.157
3186	W04G3.1	3.5	924.502
10086	NHL repeat protein	2e-21	925.474
8656	predicted protein	0.009	925.995
9634	hypothetical protein bll7210	0.5	926.005
9945	Aspartyl/Asparaginyl beta-hydroxylase	1.2	926.334
11287	DEAD box RNA helicase	3e-36	926.354
9226	unnamed protein product	0.032	926.811
3164	protein of unknown function DUF490	0.16	927.594
6135	similar to catecholamine-O-methyltransf...	8e-39	927.929
3396	beta-lactamase domain protein	1	928.45
376	hypothetical protein LOC431873	2.2	929.026
9275	unnamed protein product	2e-06	929.227
3813	hypothetical protein CHLREDRAFT_169251 ...	8e-05	930.143
4998	2',3'-cyclic-nucleotide 2'-phosphodieste...	3.2	930.341
1483	unknown protein	2.2	930.866
11517	hypothetical protein UM02501.1	0.1	931.091
4704	lipase	2e-59	933.127
7291	3' exoribonuclease	2e-41	933.592
5332	internal virion protein	0.018	933.711
417	PREDICTED: hypothetical protein	0.12	934.434
11172	Ricin B lectin	0.0007	934.757
11281	hypothetical protein	0.024	935.167
7482	C-5 cytosine-specific DNA methylase, pu...	8e-29	936.571
3587	exonuclease family protein	1e-26	937.028
5542	P13-like protein	2e-12	937.126
11660	*No hits found*	0	937.492
670	hypothetical telomeric SfiI fragme...	0.34	938.568
8971	WD-40 repeat	2e-36	938.901
526	alpha-galactosidase-like protein	3e-18	938.94
680	Fibronectin, type III domain protein	9e-16	940.584
6793	enoyl-CoA hydratase	0.45	940.688
4288	putative protein tyrosine phosphatase, dua...	7e-15	940.789
5623	predicted protein	2e-13	940.853
4731	*No hits found*	0	942.408
7922	PREDICTED: similar to cathepsin B prepropr...	6e-29	942.419
5664	D-alanyl-D-alanine carboxypeptidase/D-al...	0.7	942.971
6090	HAD-superfamily hydrolase, subfamily II...	0.58	943.009
5180	Circumsporozoite protein precursor, put...	0.12	943.325
11817	hypothetical protein BBOV_II000290	0.002	945.017
5653	unknown	2e-05	946.068
5260	AGAP003262-PA	4	946.615
11495	COG0625: Glutathione S-transferase	4e-05	946.633
7704	proteophosphoglycan ppg4	0.005	946.805
3005	PREDICTED: mucin 16	1.7	947.474
2627	predicted protein	5e-06	947.655
2221	unnamed protein product	0.003	947.966
3903	ChaC-like protein	2e-19	948.019
6828	hypothetical protein GSPATT00021976001 ...	0.0002	948.085
9711	pentatricopeptide (PPR) repeat-containing ...	2e-11	948.349
5941	ATP-binding cassette transporter, subfa...	2e-21	948.449
7951	cyclic nucleotide-binding protein	1.4	948.807
3746	hypothetical protein PY07506	1.2	949.997
3176	hypothetical protein RPE_2995	2	950.176
3594	hypothetical protein An12g09190	0.54	951.098
2815	hypothetical protein Franean1_2558	0.85	952.659
2690	RNA-directedRNA polymerase	8.6	952.661
7239	unnamed protein product	0.0001	952.991
1496	PREDICTED: similar to oocyte-specific hist...	0.004	954.219
940	hypothetical protein LOC735140	0.37	954.281
10016	hypothetical protein MM_2866	1e-06	954.73
11254	hypothetical protein	0.32	954.839
9003	PREDICTED: corin isoform 3	0.003	955.289
8615	GA18691-PA	0.9	955.695
1350	hypothetical protein TVAG_021170	1.4	955.858
8025	HMG-1	2e-08	956.093
11785	PREDICTED: similar to CAP-binding prote...	1.3	956.941
2998	GATA factor	2.4	957.222
1117	hypothetical protein TVAG_480230	0.77	959.938
8381	Glucose-repressible alcohol dehydrogenase t.	4e-12	960.602
8515	PREDICTED: similar to KIAA0564 protein ...	7e-24	961.032
203	PREDICTED: hypothetical protein, partia...	2.2	961.276
1062	nitric oxide synthase-related protein	0.67	961.916
2505	PREDICTED: similar to SRY-box 17	0.064	963.723
1442	RNA binding protein	4.9	963.773
9489	PREDICTED: similar to ankyrin 2,3/unc44...	6e-17	964.356
8557	hypothetical protein CIMG_02292	3.9	964.555
5483	COG4886: Leucine-rich repeat (LRR) prote...	9e-18	964.905
11661	PREDICTED: similar to hepatoma-derived ...	0.002	966.264
449	Paramyosin (Allergen Blo t 11) >gi|219...	4e-06	968.094
11586	mitochondrial citrate synthase 1	0.021	968.455
7863	Protein kinase domain containing protei...	0.063	968.556
9107	unknown	0.005	968.59
5782	hypothetical protein DDBDRAFT_0204155	0.074	969.443
5726	modification methylase DdeI	0.82	969.536
4295	hypothetical protein AaeL_AAEL009354	0.26	969.819
3779	PREDICTED: similar to ataxia telangiect...	4e-54	970.014
6915	hypothetical protein BPP3632	1.2	970.628
5106	expressed protein	1e-07	970.675
4119	SD01679p	0.006	971.991
11257	TspGWI restriction endonuclease	0.033	972.461
6674	Bromodomain containing protein	2.2	972.952
467	PREDICTED: similar to MEF2-activating S...	0.0003	973.139
8484	lipoprotein, putative	0.71	973.242
1214	ribonuclease R	6.5	973.669
3495	hypothetical protein	2.5	975.058
10261	PREDICTED: similar to sirtuin type 1	1.3	975.377
3789	ribosomal phosphoprotein P0	9e-17	975.407
8089	HSP90-like protein	8e-71	975.593
5217	tonB protein	2.7	975.626
7037	predicted protein	0.0008	975.696
3554	O-linked GlcNAc transferase	9e-14	975.811
5500	cag7	0.96	976.332
7924	predicted protein	0.008	976.452
972	predicted protein	2.3	976.528
5902	hypothetical protein BcerB_18989	0.0002	976.981
11209	DIFferentiation abnormal family member (di...	4e-07	977.686
1458	PREDICTED: similar to mKIAA1668 protein...	0.27	977.884
1122	casein kinase 1, delta	1e-63	977.92
10770	Hypothetical protein GL50803_32893	3.9	977.971
8461	Aspartyl/Asparaginyl beta-hydroxylase	3e-06	977.996
9755	predicted protein	2e-11	978.688
5182	calponin homology (CH) domain-containing p...	0.24	979.091
3568	Hypothetical protein	0.0002	980.027
686	*No hits found*	0	980.426
2175	hypothetical protein sce0791	1.2	981.65
415	heat shock protein DnaJ homologue Pfj2	3e-16	982.812
11915	unnamed protein product	2.4	982.969
2895	CG16947 CG16947-PA	2	983.61
7980	putative cytochrome P450	0.12	984.373
6394	tRNA-splicing endonuclease positive effecto...	2e-59	984.741
6610	enterotoxin	6e-10	985.165
4903	PREDICTED: similar to BUD13 homolog (ye...	2e-09	986.967
1161	unnamed protein product	0.04	987.175
8978	hypothetical protein LPC_0045	0.003	987.282
2812	calcium channel, voltage-dependent, L type, ...	0.005	987.966
191	hypothetical protein RD1_B0051	4e-09	988.663
8946	similar to catecholamine-O-methyltransf...	1e-09	989.071
1226	PREDICTED: similar to DDHD domain conta...	3e-08	989.892
9914	tetratricopeptide repeat domain protein ...	0.069	990.096
2070	GR-RBP5 (glycine-rich RNA-binding protein ...	3e-07	990.124
9148	OmpA/MotB	0.15	990.875
8503	PREDICTED: similar to cisplatin resista...	5e-05	993.597
9006	hypothetical protein SNOG_13071	8e-09	993.947
3767	cation transporter	0.11	994.262
8540	formin-like 2, isoform CRA_b	1.7	994.434
952	PREDICTED: similar to mDj4	3	994.843
3714	PREDICTED: similar to beta-1,3-galactos...	2.6	994.885
4060	unnamed protein product	0.96	994.902
4764	pyruvate flavodoxin/ferredoxin oxidoredu...	1.1	994.985
11076	PREDICTED: similar to chromogranin B pr...	1	995.946
6213	cation channel family protein	8e-11	996.081
10702	hypothetical protein FP0158	3e-09	996.583
7551	NADH dehydrogenase subunit 3	3	997.065
9249	thiamine biosynthesis lipoprotein	0.34	998.936
6818	Thioredoxin family protein	0.007	999.718
3430	hypothetical protein PMT1722	0.003	999.805
10455	*No hits found*	0	1000.02
10049	PREDICTED: similar to interferon-induci...	0.001	1003.03
217	transposase DOPA	4.1	1003.23
11448	hypothetical protein GobsU_24356	1.5	1003.4
7870	hypothetical protein	1e-09	1003.45
1000	B1620_F3_117	1.3	1003.5
4001	PREDICTED: similar to SpAN protein	5e-22	1003.56
463	polyphosphoinositide binding prote...	0.031	1004.73
6089	MPBQ/MSBQ transferase cyanobacterial type (...	8e-07	1004.95
9933	predicted protein	0.038	1005.87
5976	Initiation factor eIF-4 gamma, middle; Up-fr...	1e-14	1007.23
11442	unnamed protein product	0.0009	1007.38
2618	helicase domain protein	1.7	1007.82
6065	hypothetical protein UM04509.1	0.058	1008.98
7326	ADP-ribosylation/Crystallin J1	1e-23	1009.4
3446	hypothetical protein LinJ20.0180	6.1	1009.72
1067	hypothetical protein PICST_33727	0.22	1009.83
1924	*No hits found*	0	1010.14
3370	predicted protein	2e-09	1010.37
6447	predicted protein	0.048	1010.4
5650	hypothetical protein SS1G_07247	1	1010.83
10606	LSM Sm-like protein family member (lsm-1) ...	2e-15	1011.05
7691	Putative glycosyl transferase	0.0001	1011.28
1164	GAUT10/LGT4 (Galacturonosyltransferase 10)...	6e-05	1011.63
11112	oligosaccharyl transferase subunit, putati...	4e-40	1012.54
8090	PREDICTED: hypothetical protein	0.92	1012.58
4661	predicted GTPase	8e-40	1012.86
1927	*No hits found*	0	1013.12
5354	PREDICTED: similar to mutated in bladde...	0.78	1013.14
5452	hypothetical protein LOC405858	0.78	1013.5
8157	hypothetical protein CLOSCI_03789	6e-05	1013.8
2608	troponin C	0.004	1013.86
11886	ubiquitin-protein ligase E3	1e-15	1014.01
3907	JmjC domain protein	0.007	1014.15
8849	HAD-superfamily hydrolase subfamily IA, ...	2e-13	1014.37
551	PREDICTED: similar to Eukaryotic translati...	8e-33	1014.43
8545	PREDICTED: hypothetical protein XP_858040 ...	0.72	1014.95
7565	hydrogenase expression/formation protein H...	1.8	1015.15
896	*No hits found*	0	1017.03
10505	EF hand domain protein	4e-09	1017.23
5525	PREDICTED: similar to GRIP and coiled-coil...	0.2	1017.45
4822	predicted mitochondrial protein	5e-16	1017.66
1016	*No hits found*	0	1017.83
4763	hypothetical protein NE0791	0.066	1018.12
9741	unnamed protein product	0.002	1018.18
8467	OSJNBa0028M15.28	5	1018.22
2139	hypothetical protein PM8797T_13590	0.34	1018.41
11775	COG1413: FOG: HEAT repeat	1e-05	1018.56
10543	protein-L-isoaspartate(D-aspartate) O-meth...	0.14	1019.66
7604	nitrate-binding protein NasS, putative	0.14	1021.16
3654	NAD-dependent deacetylase SIRT2 (ISS)	3e-44	1021.31
1010	cholinergic receptor neuronal nicotinic alph...	2.2	1021.48
11320	predicted protein	0.38	1022.14
1537	hypothetical protein CHLREDRAFT_188353 ...	0.26	1022.35
9725	ATP-binding cassette transporter, subfa...	2e-12	1022.47
3516	ferredoxin protein precursor	6e-43	1022.47
1008	hypothetical protein PB300478.00.0	0.22	1022.6
2336	myosin class 11-2	8e-41	1023.76
362	mCG5996	0.77	1023.86
1552	6-phosphofructo-2-kinase/fructose-2,6-b...	0.006	1023.92
5188	hypothetical protein NCU00658	0.059	1024.51
5857	Probable oxidoreductase	6	1024.6
11904	soluble guanylate cyclase gcy	1.5	1024.6
5381	high mobility group protein	1e-16	1025.12
5895	hypothetical protein TTHERM_00535430	9e-76	1025.25
7440	RING finger domain protein, putative	0.57	1025.62
9525	lupus la ribonucleoprotein	0.72	1026.35
798	CoA-binding protein	3e-08	1027
1498	*No hits found*	0	1027.08
6029	hypothetical protein OsJ_001973	0.013	1028.72
3441	hypothetical protein FG03385.1	0.3	1029.28
3054	PREDICTED: similar to Nod1	8e-06	1029.31
4633	TlmH	2e-12	1029.83
7236	putative LicD-family phosphotransferase	3e-05	1031.17
5461	dienelactone hydrolase family protein	0.002	1031.3
5250	Kef-type K+ transport system, putative NAD-b...	1.9	1031.57
1935	PREDICTED: hypothetical protein	2e-05	1032.21
4760	Hypothetical protein CBG13603	2.9	1032.49
10397	PREDICTED: similar to TRF1-interacting ank...	9e-06	1032.64
11616	uv excision repair protein rad23	0.069	1032.74
1467	hypothetical protein GSPATT00036951001 ...	2e-08	1034.11
10786	hypothetical protein, unknown function ...	0.039	1034.84
9917	calcium-dependent protein kinase 2	7e-05	1035.04
1355	hypothetical protein lin2576	0.018	1035.41
7804	hypothetical protein, conserved	0.01	1035.51
4645	Acylphosphatase family protein	9e-25	1035.68
3129	hypothetical protein CAGL0I03344g	0.0007	1036.5
305	beta (1-->2) glucan biosynthesis protein	0.63	1036.8
4184	putative dihydrolipoamide succinyltransfera...	0.59	1036.93
914	calmodulin-binding protein	5e-08	1037.38
3941	hypothetical protein OsJ_006404	0.032	1038.1
1198	predicted protein	0.054	1038.53
9985	putative prolyl 4-hydroxylase, alpha subunit...	3e-15	1039.53
4022	elongation factor-1 gamma	2e-16	1039.68
5767	predicted protein	0.0005	1039.72
4882	ankyrin 2,3/unc44	4e-30	1039.77
3850	translation initiation factor if-2 betam b...	4e-49	1040.46
2434	pteridine transporter, putative	0.17	1040.48
8073	hypothetical protein PPSIR1_08621	0.9	1041
4632	IucA/IucC family protein	0.36	1043.18
3969	predicted protein	6e-18	1043.33
7838	PREDICTED: DHHC-containing protein 20	1e-16	1043.51
10182	proteophosphoglycan 5	0.005	1043.7
10251	transcription initiation factor TFIID, ...	5e-15	1043.97
9761	*No hits found*	0	1044.57
4034	zinc knuckle domain protein	0.06	1045.11
9936	Putative ankyrin-like membrane protein	0.0004	1045.71
9679	PREDICTED: similar to CG1391-PB, isoform B...	4e-16	1045.98
911	*No hits found*	0	1046.52
2682	polyA-binding protein CG5119-PA, isoform A...	3e-06	1047.68
6782	PREDICTED: hypothetical protein	0.034	1047.73
6876	hypothetical protein UM05666.1	0.39	1048.02
1221	*No hits found*	0	1050.09
147	hypothetical protein AaeL_AAEL013062	0.95	1051.18
11046	K+ channel protein	3e-11	1051.7
7472	hypothetical protein OsI_005634	0.059	1052.13
10654	voltage gated chloride channel family pr...	1.3	1053.06
3237	methyltransferase-like protein	0.0003	1053.52
2130	predicted protein	0.11	1054.06
9241	serine racemase	5e-33	1055.59
8498	PREDICTED: golgi autoantigen, golgin su...	0.012	1055.63
11051	putative M23-family peptidase	0.26	1055.86
2127	hypothetical protein UM06152.1	0.046	1055.92
5517	Protein kinase domain containing protei...	2e-15	1057.2
11247	PREDICTED: similar to Ankyrin repeat do...	8.5	1057.22
6259	unknown	1.3	1057.76
658	PREDICTED: similar to ETS-domain transc...	0.081	1057.88
4976	guanylate cyclase	1	1059.3
5832	putative GATA-binding transcription factor...	0.002	1060.6
2728	hypothetical protein, conserved	0.21	1061.28
4260	Hypothetical protein LEPBI_I1215	2e-12	1061.53
602	hypothetical protein EE36_04798	1.7	1061.85
4828	predicted protein	0.61	1062.3
4693	hypothetical protein DDBDRAFT_0189698	0.068	1062.72
8392	PREDICTED: similar to L-delphilin	1.4	1063.42
5350	Site-specific recombinase XerC	3.2	1064.38
9676	BRH1 (BRASSINOSTEROID-RESPONSIVE RING-H2);...	4e-07	1065.13
1063	putative outer membrane adhesin like pr...	6e-26	1065.65
3686	putative NBS domain resistance protein	1.9	1067.3
11474	predicted protein	3e-09	1068.01
690	PREDICTED: similar to KIAA1545 protein	0.004	1068.24
9459	protein kinase C substrate 80K-H	5e-25	1069.08
7567	S-adenosylmethionine:tRNA ribosyltransfe...	0.77	1069.46
8858	hypothetical protein PVX_080510	0.12	1069.83
8973	PREDICTED: similar to tRNA splicing 2 phos...	8e-31	1070.64
11670	hypothetical protein GSPATT00025674001 ...	8e-05	1070.7
4407	PREDICTED: similar to GTX	0.34	1070.71
4186	cyclic GMP-dependent protein kinase	8e-29	1070.73
1995	2,5-didehydrogluconate reductase	2e-13	1072.04
9704	dihydrouridine synthase (Dus) domain co...	1e-26	1072.84
11601	unknown	2e-25	1072.97
2025	saccharopine dehydrogenase	0.51	1073.27
1202	glycoside hydrolase family 47 protein	8.5	1073.85
627	BAT2 domain containing 1, isoform CRA_d	2.1	1073.95
598	hypothetical protein UM00494.1	0.048	1074.1
1434	predicted protein	0.021	1074.49
320	carbohydrate kinase, FGGY	2e-06	1074.66
4046	hect E3 ubiquitin ligase	1e-07	1074.94
9495	hypothetical protein FG06971.1	0.78	1074.96
7826	predicted protein	0.12	1075.86
901	hypothetical protein	1.3	1076.5
5723	Methyltransferase type 11	5e-08	1077.43
9566	WD-40 repeat family protein / zfwd4 protei...	0.13	1078.56
7013	hypothetical protein CNBM0230	0.032	1078.58
6022	CG17493 CG17493-PA	0.007	1079.66
4847	predicted protein	0.019	1079.69
10192	hypothetical protein MT325_M417L	5e-05	1080.35
6267	hypothetical protein FG07238.1	0.22	1080.53
514	*No hits found*	0	1080.95
4850	RNA-binding S4 domain protein	0.16	1081.08
2973	conserved hypothetical protein	0.26	1081.12
6757	hypothetical protein LOC690415	0.037	1081.3
7360	thiolase	2.8	1082.81
7612	Os09g0244600	0.27	1083.33
9992	acetyltransferase (GNAT) family	3e-14	1083.38
5160	oxidoreductase, acting on paired donors, w...	3e-22	1083.58
7829	family with sequence similarity 82, member...	2.5	1083.83
8047	nitrile hydratase, alpha subunit	1e-35	1084.49
6611	predicted protein	0.019	1084.57
7217	cyclic nucleotide-binding protein	2e-05	1084.82
210	AIG2 family protein	0.16	1084.86
5973	chordin-like 2 (predicted), isoform CRA_c	5.3	1085.9
10116	predicted protein	3e-05	1087.34
3133	kelch domain-containing protein	0.018	1088.07
10930	hydrolase TatD family protein	2e-18	1089.01
11333	protein kinase	0.012	1089.28
3741	PREDICTED: hypothetical protein	0.56	1090
2261	ankyrin-repeat containing protein	0.0002	1090.18
1121	hypothetical protein LOC70354	0.027	1090.75
4253	NUDC-like protein; nuclear movement protein...	3e-07	1091.73
2687	unnamed protein product	0.016	1092.66
4310	F-box leucine-rich repeat protein 13	1e-07	1093.17
5581	Putative voltage-dependent potassium ch...	0.082	1094.06
1352	mitochondrial ornithine carrier protein...	2e-10	1094.15
8671	glutamyl-tRNA synthetase	0.39	1094.38
8861	viral A-type inclusion protein, putativ...	2e-07	1095.18
10940	*No hits found*	0	1096.64
3211	TnpC protein	0.16	1097.04
6557	cell wall surface anchor family protein	0.003	1097.82
752	conserved hypothetical protein	2.2	1097.98
7534	arginine n-methyltransferase	5e-14	1098.22
10218	PREDICTED: similar to interferon-induci...	3e-05	1098.25
1758	hypothetical protein GSPATT00011777001 ...	0.003	1098.54
963	enoyl-CoA hydratase	2e-26	1099.66
8970	PREDICTED: similar to WNK lysine deficient...	1.3	1099.81
5919	hypothetical protein TVAG_068370	0.93	1100.95
837	*No hits found*	0	1102.53
7860	cephalic hedgehog protein	2e-16	1102.82
6150	tac7077, putative	4e-25	1102.87
2802	PREDICTED: similar to membrane-associat...	0.0005	1103.2
6164	glutathione S-transferase-like	3e-20	1103.21
11330	Carboxylesterase and related proteins (ISS)...	4e-26	1103.25
6168	FAD dependent oxidoreductase	0.016	1104.34
3444	zinc finger (C3HC4-type RING finger) famil...	1e-16	1104.44
11728	hypothetical protein AaeL_AAEL001250	1.4	1104.53
1150	*No hits found*	0	1104.6
7351	negative transcriptional regulator of prp sp...	0.2	1105.3
7725	PREDICTED: inner centromere protein antige...	0.005	1105.55
2941	voltage-gated calcium channel subu...	0.28	1106.78
8536	cysteinyl-tRNA synthetase	0.0002	1110.01
9514	NHL repeat containing 3 isoform a	2e-09	1110.65
10837	predicted protein	6e-05	1111.23
2668	PREDICTED: similar to ubiquitin and rib...	0.41	1111.46
9316	PREDICTED: similar to lysophospholipase...	3e-19	1111.92
5315	Kynurenine 3-monooxygenase and related flav...	1e-29	1112
3512	amidohydrolase	8e-24	1112.2
9264	conserved hypothetical protein	0.85	1113.41
7941	GRN protein	0.84	1113.5
9662	glycerate kinase	0.003	1113.85
2408	thioredoxin containing NifU domain	2.3	1114.01
499	PREDICTED: hypothetical protein	0.26	1115.48
535	ovarian cancer gene-2 protein	7e-07	1116.83
2096	*No hits found*	0	1116.92
7420	hypothetical protein SNOG_12294	0.14	1117.25
11813	unknown protein	0.26	1117.8
331	*No hits found*	0	1118.58
8530	dolichyl-P-Man:Man7GlcNAc2-PP-dolichyl alp...	1e-17	1118.94
8883	Leishmanolysin family protein	0.0007	1118.99
3136	Insulin degrading metalloproteinase CG5517...	5e-40	1119.49
7006	WD repeat protein, human IQWD1 family	6e-09	1120.68
2160	PHD finger domain protein, putative	2.1	1121.36
11605	PknD	0.38	1122.03
4959	cyclin-dependent kinase 3, putative	2e-21	1122.44
2712	*No hits found*	0	1123.09
2227	hypothetical protein LOC_Os03g07090	0.64	1123.56
968	Calreticulin precursor >gi|3970687|emb...	1.7	1123.87
8985	cadmium resistance transporter	0.92	1123.9
8960	UbiE/COQ5 methyltransferase	5	1124.2
1123	*No hits found*	0	1124.52
7673	hypothetical protein CC1G_02058	0.026	1124.65
578	hypothetical protein	0.004	1126.29
3382	hypothetical protein TTHERM_00048820	6e-10	1126.88
149	hypothetical protein AN4952.2	4e-05	1127.35
7336	unnamed protein product	1.1	1127.69
3616	Methyltransferase FkbM	5e-12	1128.15
8330	conserved hypothetical protein	0.018	1128.22
5449	PREDICTED: similar to protein-tyrosine ...	6e-13	1128.6
1314	isochorismatase hydrolase	3.8	1129.1
3958	unnamed protein product	0.17	1129.14
2360	methyl-accepting chemotaxis sensory tra...	0.001	1129.45
11252	GTP-binding protein engA	1e-23	1129.99
4179	PREDICTED: hypothetical protein	0.7	1130.01
3865	PREDICTED: similar to dynactin	0.018	1130.67
3161	hypothetical protein NtherDRAFT_0928	2.4	1131.3
9248	hypothetical protein LinJ31.3710	0.27	1131.58
2129	hypothetical protein RB4715	0.5	1131.94
6165	NADH (or F420H2) dehydrogenase, subunit...	1e-06	1132.46
1443	*No hits found*	0	1133.01
10820	hypothetical protein	0.49	1133.16
8703	PREDICTED: similar to transitin	2.9	1133.22
644	pB407L	0.005	1133.41
389	hypothetical protein OsI_024445	0.001	1134.54
8794	nicotinamide-nucleotide adenylyltransferas...	0.7	1134.65
6927	PAK1 interacting protein 1	1e-25	1135.82
3524	PREDICTED: similar to PR domain-containing...	2	1135.86
9254	PREDICTED: similar to LOC780781 protein...	0.14	1135.9
4521	hypothetical protein L8106_17907	0.82	1136.36
11805	hypothetical protein FG06880.1	1.3	1136.45
4748	PREDICTED: hypothetical protein	1.4	1136.96
533	GA12627-PA	0.069	1137.14
1151	*No hits found*	0	1137.59
7958	hypothetical protein EUBSIR_01235	0.54	1137.83
11171	PREDICTED: hypothetical protein	0.066	1138.65
10146	60S ribosomal protein I21	3e-66	1139.61
5760	TPA: zinc finger protein	0.018	1140.12
6869	cysteinyl-tRNA synthetase	0.004	1140.14
7064	hypothetical protein CNBC3330	0.4	1140.57
3607	PBS lyase HEAT domain protein repeat-co...	2e-11	1141.19
8992	unkempt homolog	0.035	1141.22
4000	Os06g0713300	0.55	1141.29
736	hypothetical protein CV_0466	2.7	1141.58
247	predicted mitochondrial protein	3e-08	1141.75
10636	2-isopropylmalate synthase	1.8	1142.43
5786	ALVEOLIN1	9e-05	1143.61
6088	hypothetical protein GSPATT00017615001 ...	0.0004	1144.24
11138	hypothetical protein CNA00380	1e-06	1144.61
395	hypothetical protein BACSTE_01125	0.013	1145.48
8568	hypothetical protein GSPATT00007677001 ...	1	1145.66
11749	RNA recognition motif (RRM)-containing pro...	4e-05	1145.95
6723	hypothetical protein RUMOBE_03451	0.25	1147.7
9238	monooxygenase, flavin-contaning	3e-24	1147.93
10476	class II aldolase/adducin family protei...	2.3	1148.62
9499	hypothetical protein CC1G_08970	0.45	1152.12
1548	*No hits found*	0	1152.38
6942	predicted protein	0.01	1153.2
5929	paraflagellar rod protein	0.99	1153.36
10916	dipeptidase	9e-34	1153.7
7879	FF domain-containing protein / WW domain-c...	2e-06	1153.92
566	isochorismatase hydrolase	2e-87	1154.3
4431	phosphoglycolate phosphatase	0.51	1154.57
351	Hypothetical protein CBG17156	0.002	1154.79
7835	hypothetical protein, conserved	0.33	1155.09
1023	unnamed protein product	3	1155.61
10184	predicted protein	7e-20	1155.65
5100	hypothetical protein SNOG_01385	0.37	1157.18
5899	predicted protein	0.72	1157.45
3664	hydrolases of the alpha/beta superfamily	2e-05	1158.07
7287	phycocyanin alpha phycocyanobilin lyase rel...	2e-16	1158.43
998	*No hits found*	0	1158.78
593	Hypothetical protein CBG12695	2	1159.13
5066	hypothetical protein Spea_0472	0.68	1159.4
10112	conserved hypothetical protein	0.017	1159.41
1659	protocadherin alpha subfamily C, 1	0.77	1159.68
11019	Dl	1.8	1160.34
301	CG7507-PA	0.032	1160.42
7909	predicted protein	2e-08	1161.26
8846	Os08g0486200	0.19	1161.35
10979	predicted protein	0.59	1161.55
536	aminoacyl-histidine dipeptidase	3e-16	1161.92
10703	hypothetical protein cihA8L18	8.4	1163.83
3609	venom metalloproteinase bothrojarin1	1.1	1163.93
1001	*No hits found*	0	1164.19
4082	PREDICTED: similar to Fragile X mental ...	4e-05	1164.51
7670	hypothetical protein FG07430.1	0.48	1164.85
1836	T32E20.30	0.009	1165.12
3618	MGC89323 protein	1e-79	1166.1
9383	conserved hypothetical membrane protein...	2e-06	1166.12
10027	O-methyltransferase	2e-12	1166.33
2666	PREDICTED: similar to CCAAT displacement p...	0.02	1167.52
6173	ureidoglycolate hydrolase	0.0001	1168.39
2004	hypothetical protein	3e-28	1168.54
11057	HNWD1	7e-13	1168.66
687	PAB4 (POLY(A) BINDING PROTEIN 4); RNA bind...	1e-09	1169.09
3645	unknown	0.048	1169.35
5736	hypothetical protein	3	1169.5
9719	peptidase S41	0.46	1170.33
9710	PREDICTED: similar to Epsin-3 (EPS-15 inte...	0.099	1170.36
2112	Sterol 3-beta-glucosyltransferase	3.8	1170.54
2761	plastid fructose-1,6-bisphosphate aldolase c...	1e-82	1170.89
1330	chitin synthase activator (Chs3), putat...	0.0001	1171.17
1919	wx protein	1e-39	1171.18
11707	hypothetical protein, conserved	1	1171.24
9017	n-acetylgalactosaminyltransferase	9e-06	1171.34
2706	mCG140986	1.7	1171.35
8893	THUMP domain containing 2	2e-21	1171.35
8355	tagaturonate reductase	5e-20	1171.54
885	unnamed protein product	0.011	1171.65
7642	PREDICTED: similar to LMBR2	3e-06	1171.69
9963	Heparinase II/III family protein	0.83	1172.06
10385	hypothetical protein MCA2832	1.7	1172.79
10734	ATP-dependent RNA helicase, putative	0.18	1173.07
11637	Phosphoglycerate mutase	0.02	1173.51
2477	FAD linked oxidase domain protein	6e-22	1173.59
4128	unknown	0.0002	1174.92
9069	Glycosyltransferases involved in cell wall ...	8.4	1175.35
983	*No hits found*	0	1175.81
6950	hypothetical protein SynWH7803_0996	0.072	1176.38
7153	predicted protein	0.018	1176.63
11086	hypothetical protein	0.51	1176.94
9261	ribosomal protein L7Ae family protein	5e-75	1177.02
228	splicing factor SRp54	0.61	1177.08
9808	unknown protein	0.035	1177.78
11131	PREDICTED: similar to rCG63049	0.002	1177.8
7806	trans-sialidase, putative	0.18	1178.96
459	Lysyl hydroxylase (ISS)	1.8	1179.27
11229	ABC transporter	2.6	1179.46
11762	P13-like protein	6e-12	1179.55
237	binding protein 2	8e-08	1179.91
8251	predicted protein	6e-40	1179.93
7939	hypothetical protein PY02772	0.0001	1179.93
3193	Outer membrane receptor protein	1.8	1180.33
1222	flagellar associated protein	0.16	1180.7
11307	possible alkylated DNA repair protein	2e-10	1180.72
748	*No hits found*	0	1180.75
1515	ubiquitin-protein ligase	0.003	1181.1
1529	*No hits found*	0	1181.35
5993	Lysyl endopeptidase	2.5	1182.56
1549	hypothetical protein DSM3645_02653	6.4	1183.36
1542	putative oxidoreductase	0.024	1183.64
9820	Usher syndrome 1C (autosomal recessive,...	0.081	1183.78
11067	solute carrier family 25 (mitochondrial car...	9e-07	1184.16
6297	predicted protein	0.094	1184.86
822	unnamed protein product	0.002	1185.22
11822	PRP38 pre-mRNA processing factor 38 (ye...	3e-47	1185.46
8072	similar to high mobility group box 2	7e-07	1185.74
3348	virion morphogenesis protein	0.23	1185.88
8737	hypothetical protein N9414_24273	0.006	1186.34
9192	monooxygenase family protein	1e-34	1186.36
5612	PREDICTED: similar to tryptophanyl-tRNA...	9e-90	1187.82
4262	hypothetical protein Chro.80595	0.69	1188.04
9382	regulator of chromosome condensation, RC...	2e-09	1188.42
3559	Beta-galactosidase	1e-32	1189.71
1223	Protein with nucleic acid binding motif...	1.3	1189.83
6522	PREDICTED: hypothetical protein	0.44	1189.96
3747	CobW	1e-77	1190.02
1367	*No hits found*	0	1191.48
8683	hypothetical protein BBOV_III005700	0.19	1191.54
1391	hypothetical protein BC1G_07421	1.5	1191.55
7818	WD-40 repeat protein	3e-24	1192.14
6566	calrectulin	2e-29	1192.52
5446	transcriptional regulator ATRX (X-linke...	0.011	1193.4
6021	Protein kinase domain containing protei...	4e-24	1194.13
9880	hypothetical protein Xaut_3871	4e-22	1194.6
8999	DNA topoisomerase	0.34	1194.92
1703	hypothetical protein DDBDRAFT_0187180	1e-10	1195.96
10220	PREDICTED: TSR1, 20S rRNA accumulation,...	2e-05	1196.2
3912	Phytanoyl-CoA dioxygenase	2e-28	1196.48
3363	hypothetical protein Smed_6119	9e-08	1197.79
2722	AGAP010397-PA	3e-31	1199.08
6111	histone methyltransferase	0.56	1199.21
6810	excinuclease ABC subunit A-like protein	1.7	1199.4
2699	hypothetical protein Bm1_50970	0.0003	1199.85
11420	60S ribosomal protein L34-a, putative	2e-29	1200.34
4730	hypothetical protein CHLREDRAFT_189453 ...	0.67	1200.89
299	hypothetical protein RS9916_31302	0.42	1201
5129	kinesin	4e-22	1201.27
7474	Tlm Orf10	1e-16	1201.88
10533	Methyltransferase type 11	7e-44	1202.54
4614	predicted protein	0.18	1204
4635	cellulose-binding protein	0.031	1204.27
7841	PREDICTED: similar to Ubiquitin carboxy...	3e-36	1204.49
2479	predicted protein	0.007	1204.53
6618	type I polyketide synthase	0.0004	1204.74
2715	putative senescence-associated protein	0.041	1205.47
2436	NAD(P)H-dependent D-xylose reductase (X...	1e-17	1205.63
6568	transcriptional regulator, AraC family	2.7	1205.95
10029	Glucosylceramidase	6e-41	1206.01
9256	Beta-lactamase-like:RNA-metabolising met...	2.8	1206.5
6912	ADP-ribosylglycohydrolase	2e-13	1207.2
1014	conserved hypothetical protein	1	1207.89
372	predicted protein	3e-17	1208.05
1506	EF-1 alpha-like protein	6e-32	1208.29
6347	hypothetical protein Aave_0107	9e-06	1208.55
733	hypothetical protein LMJ_0193	6.5	1208.59
6403	FtsH-like cell division protein	0.009	1208.6
9623	hypothetical protein SNOG_03319	0.22	1208.67
9957	protein containing VWFA domain	7e-21	1209.15
9708	hypothetical protein CHLREDRAFT_206193 ...	0.001	1209.2
2782	Bowman-Birk serine protease inhibitor fami...	0.93	1209.25
892	Glutathione S-transferase domain	9e-33	1209.64
4476	predicted protein	0.056	1210.24
5419	unnamed protein product	0.44	1210.71
2051	hypothetical protein PGUG_02063	0.0005	1210.87
883	PREDICTED: similar to Calcium/calmoduli...	8e-24	1211.08
5274	conserved hypothetical protein	0.68	1211.11
1835	ST3 beta-galactoside alpha-2,3-sialyltransfe...	7.2	1211.74
8136	COG0457: FOG: TPR repeat	3e-10	1212.02
8768	hypothetical protein CHGG_08925	0.031	1212.05
2966	predicted protein	0.27	1212.12
11594	AGR119Cp	0.75	1212.76
4023	PREDICTED: similar to SH2 domain binding p...	0.51	1212.87
7455	PREDICTED: frizzled homolog 8 (Drosophila)...	0.4	1212.98
8827	Epstein-Barr virus EBNA-1-like	0.073	1213.29
1724	hypothetical protein CMS1664	0.0008	1213.76
991	PREDICTED: PR domain containing 12	0.27	1214.43
750	COG0795: Predicted permeases	1.3	1214.62
7422	predicted protein	5e-24	1215.32
10392	predicted protein	0.46	1215.61
10284	RNA-binding protein	3e-22	1215.86
497	orphan G protein-coupled receptor GPR44	2.9	1215.97
256	Putative glycosyl transferase	0.0007	1215.98
6063	Protein of unknown function DUF1465	1.4	1216.04
852	hypothetical protein GSPATT00011733001 ...	6e-05	1216.59
974	PREDICTED: hypothetical protein	3.9	1217.01
3840	vitellogenin	3.4	1217.35
8406	UV excision repair protein Rad23 contai...	8e-18	1217.43
2157	copper/zinc superoxide dismutase	4e-21	1218.05
3445	beta-glucosidase	8e-20	1218.16
291	CG13588 CG13588-PA	0.39	1218.33
4051	uroporphyrinogen III synthase	6e-23	1218.35
2500	PREDICTED: similar to hCG28571	0.16	1218.5
7330	putative prolyl 4-(ISS)	0.02	1219.66
1832	PREDICTED: similar to MGC81461 protein ...	0.056	1220.75
6791	beta-1,4-endoglucanase 2 precursor...	0.006	1221.44
10240	RNA helicase, DRH1	4e-08	1221.75
4124	hypothetical protein, unknown function ...	0.021	1223.03
10685	Rieske (2Fe-2S) domain protein	3.4	1223.08
4016	Cobalamin synthesis protein/P47K	1e-22	1223.57
9043	PREDICTED: similar to Kinesin-like prot...	1e-31	1223.77
9850	predicted protein	1.6	1223.86
8589	*No hits found*	0	1223.92
11135	PREDICTED: similar to Microtubule-associat...	0.11	1224.03
8370	TCP-1/cpn60 chaperonin family protein	0.39	1224.07
2897	hypothetical protein TTHERM_00497400	2e-05	1224.41
8560	kyphoscoliosis peptidase, isoform CRA_a	2e-07	1225.23
1642	MOP(MATE) family transporter	5e-05	1225.42
1463	immunoglobulin heavy chain variable region	0.09	1225.5
9474	hypothetical protein, conserved	0.46	1225.66
1100	Vitellogenin-A2 precursor (VTG A2)	0.13	1226.11
9240	zinc finger (Ran-binding) family protein	8e-18	1226.33
3177	hypothetical protein P700755_12152	0.33	1226.33
7675	NAD-dependent epimerase/dehydratase	1.8	1226.69
1828	PREDICTED: similar to RAD23a homolog isofo...	2e-05	1226.93
2569	KH domain containing protein	0.0001	1227
7866	Beta-glucosidase-related glycosidases-like...	0.053	1227.23
1064	Kin17 DNA-binding protein-related	3e-15	1227.54
11453	hypothetical protein ALPR1_01255	2e-35	1227.59
8116	AN17	2e-13	1227.68
860	electron carrier/ protein disulfide oxidor...	1e-07	1228.97
3933	hypothetical protein PGUG_01202	0.018	1229.27
9767	PREDICTED: hypothetical protein	3.3	1229.33
10221	regulator of chromosome condensation 1	3e-09	1229.35
10350	hypothetical protein BoklE_01029	0.2	1229.62
553	PREDICTED: similar to centrosomal protein ...	0.002	1230.14
6066	C6 zinc finger domain protein	0.51	1230.27
7960	hydrolase	4e-18	1230.36
4097	DICHOTOMA-like protein	2.9	1230.84
7843	RENT1_NEUCR Regulator of nonsense transcrip...	1e-19	1231
1814	PREDICTED: similar to arginine-glutamic ac...	0.072	1231.44
4699	protein kinase familyprotein (ISS)	2e-06	1231.59
9161	hypothetical protein TTHERM_00353380	2e-05	1231.83
8564	hypothetical protein OsI_018997	6.6	1232.04
1070	alkyl-hydroperoxide reductase	4e-22	1232.04
5340	cGMP-dependent protein kinase 1, beta i...	2e-19	1232.51
9414	S-locus receptor kinase	5.8	1232.76
9604	Copper resistance protein CopA	4.5	1233.32
11334	mRNA processing-related protein	4e-06	1233.6
1286	ATPase of the ABC class-like protein	7e-08	1233.67
6745	unnamed protein product	0.013	1233.87
9189	putative amidohydrolase	0.34	1233.98
2334	PREDICTED: similar to F-box only protein 3...	0.67	1234.53
226	predicted protein	7e-08	1234.54
3102	Poly(A+) RNA-binding protein, involved in ...	4e-05	1234.63
9756	PREDICTED: similar to ring finger protein ...	0.018	1235.64
2507	unnamed protein product	0.0002	1235.85
2694	hypothetical protein MGG_00940	2.2	1236.92
7012	Glycerol dehydrogenase family enzyme	6.9	1236.96
2704	HSV-1 UL36-like protein	3.9	1237.05
11279	PREDICTED: similar to tenascin-C	7e-30	1237.16
10166	predicted protein	7e-05	1237.46
4592	Mucin-5AC precursor (Mucin-5 subtyp...	0.27	1238.17
11203	EF-1-alpha-related GTP-binding protein, pu...	0.002	1239.07
7539	hypothetical protein TTHERM_00138240	1.6	1239.24
4021	PREDICTED: similar to CG13396-PA isoform 2...	2	1241.39
5917	hypothetical protein	3e-09	1241.95
6843	hypothetical protein BIFDEN_01142	0.14	1243
548	vegetative cell wall protein gp1-like	2.3	1243.64
9955	PREDICTED: similar to actin binding LIM...	0.0006	1243.78
10176	unnamed protein product	3.3	1244.1
4902	predicted protein	0.37	1244.21
3199	unknown	0.81	1244.47
2780	hypothetical protein Tmz1tDRAFT_2084	1.7	1244.6
5022	signal recognition particle-docking pro...	0.001	1245.3
9972	PREDICTED: similar to Heparan sulfate 2-O-...	4e-06	1246.01
4893	PREDICTED: similar to KIAA0595 protein iso...	0.045	1246.03
2177	Cold-shock DNA-binding domain protein	0.0004	1246.04
424	PREDICTED: similar to high mobility gro...	8e-07	1246.07
4891	S-adenosyl-methionine-sterol-C- methylt...	3e-16	1246.68
1902	PREDICTED: similar to apical endosomal gly...	6.5	1246.71
10545	cGMP-specific phosphodiesterase	2.9	1246.72
201	hypothetical protein BDAG_01903	0.21	1246.96
[truncated: 5,088 more rows]
